# Supplementary material
Source: PubMed Central journal article supplement (PMC5547913)
Supplement: NIHMS872765-supplement-Supplementary_Text_and_Figures.pdf [file NIHMS872765-supplement-Supplementary_Text_and_Figures.pdf]

## SUPPLEMENTARY INFORMATION FOR:

### **Exome sequencing identifies mutation in *CNOT3* and ribosomal genes *RPL5* and *RPL10* in T-cell acute lymphoblastic leukemia**

Kim De Keersmaecker,<sup>1,2,9</sup> Zeynep Kalender Atak,<sup>1,9</sup> Ning Li,<sup>3,9</sup> Carmen Vicente,<sup>1,2</sup> Stephanie Patchett,<sup>4</sup> Tiziana Girardi,<sup>1,2</sup> Valentina Gianfelici,<sup>1,2</sup> Ellen Geerdens,<sup>1,2</sup> Emmanuelle Clappier,<sup>5</sup> Michaël Porcu,<sup>1,2</sup> Idoya Lahortiga,<sup>1,2</sup> Rossella Lucà,<sup>1,2</sup> Jiekun Yan,<sup>1,2</sup> Gert Hulselmans,<sup>1</sup> Hilde Vranckx,<sup>1</sup> Roel Vandepoel,<sup>1,2</sup> Bram Sweron,<sup>1,2</sup> Kris Jacobs,<sup>1,2</sup> Nicole Mentens,<sup>1,2</sup> Iwona Wlodarska,<sup>1</sup> Barbara Cauwelier,<sup>6</sup> Jacqueline Cloos,<sup>7</sup> Jean Soulier,<sup>5</sup> Anne Uyttebroeck,<sup>8</sup> Claudia Bagni,<sup>1,2</sup> Bassem A. Hassan,<sup>1,2</sup> Peter Vandenberghe,<sup>1</sup> Arlen W. Johnson,<sup>4</sup> Stein Aerts,<sup>1,9</sup> Jan Cools<sup>1,2,9</sup>

<sup>1</sup> Center for Human Genetics, KU Leuven, Leuven, Belgium; <sup>2</sup> Center for the Biology of Disease, VIB, Leuven, Belgium; <sup>3</sup> BGI Europe, Copenhagen, Denmark; <sup>4</sup> Section of Molecular Genetics and Microbiology, Institute for Cellular and Molecular Biology, The University of Texas at Austin, Austin, TX, USA; <sup>5</sup> Hôpital Saint-Louis, Paris, France; <sup>6</sup> AZ St-Jan, Brugge, Belgium; <sup>7</sup> Pediatric Oncology/Hematology and Hematology, VU Medical Center, Amsterdam, The Netherlands; <sup>8</sup> Pediatric Hemato-Oncology, University Hospitals Leuven, Leuven, Belgium

<sup>9</sup> equal contribution

#### **Corresponding authors:**

Stein Aerts (stein.aerts@med.kuleuven.be), Jan Cools (jan.cools@cme.vib-kuleuven.be)

#### **This .pdf document includes:**

Supplementary Note  
Supplementary Figure 1-9  
Supplementary tables 1-4, 6 and 8-11

#### **The following supplementary files are available as separate .xls files:**

Supplementary table 5  
Supplementary table 7

## List of supplementary documents:

**Supplementary Note:** Leukemia samples

**Supplementary Figure 1:** Comparison of somatic SNV filtering strategies

**Supplementary Figure 2:** The number of somatic mutations increases with age

**Supplementary Figure 3:** The number of mutations does not correlate with outcome

**Supplementary Figure 4:** Overview of mutations in recurrently but not significantly mutated genes in T-ALL samples

**Supplementary Figure 5:** Mutations in 15 identified candidate T-ALL driver genes in 17 T-ALL cell lines

**Supplementary Figure 6:** Localization of Rpl10 and Rpl5 proteins in the 60S ribosomal subunit

**Supplementary Figure 7:** DNA and RNA Sanger results RPL10 and CNOT3 mutations

**Supplementary Figure 8:** RPL10 mutated residues are close to the catalytic center of the ribosome

**Supplementary Figure 9:** T-ALL associated RPL10 mutants impair proliferation and ribosome biogenesis in yeast cells

**Supplementary Table 1:** Description patient set exome sequencing

**Supplementary Table 2:** Average alignment results over 123 samples

**Supplementary Table 3:** Sequencing and mapping statistics of the 123 samples

**Supplementary Table 4:** Detected SNV and INDEL numbers

**Supplementary Table 5:** Protein-altering (A) somatic SNVs and (B) somatic INDELS in 39 diagnosis-remission pairs

**Supplementary Table 6:** 20 significantly mutated genes

**Supplementary Table 7:** Protein-altering SNVs and INDELS in 15 candidate genes in (A) diagnosis-only samples and (B) cell lines

**Supplementary Table 8:** Patient characteristics *CNOT3* (NM\_014516.3) mutated cases

**Supplementary Table 9:** Patient characteristics *RPL* mutated cases

**Supplementary Table 10:** Association between candidate driver mutations and clinico-biological features

**Supplementary Table 11:** *RPL10*, *RPL5* and *CNOT3* PCR and sequencing primers

## **Supplementary note**

### **Leukemia samples**

T-ALL patient samples were collected at various institutions. All patients have given their informed consent and all samples were obtained according to the guidelines of the local ethical committees. This study was approved by the ethical committee of the University Hospital Leuven. Diagnosis of T-ALL was based on morphology, cytochemistry and immunophenotyping according to the World Health Organization and European Group for the Immunological Characterization of Leukemias criteria. A detailed description of the clinico-biological characteristics of the analyzed patient samples is provided in Supplementary table 1.

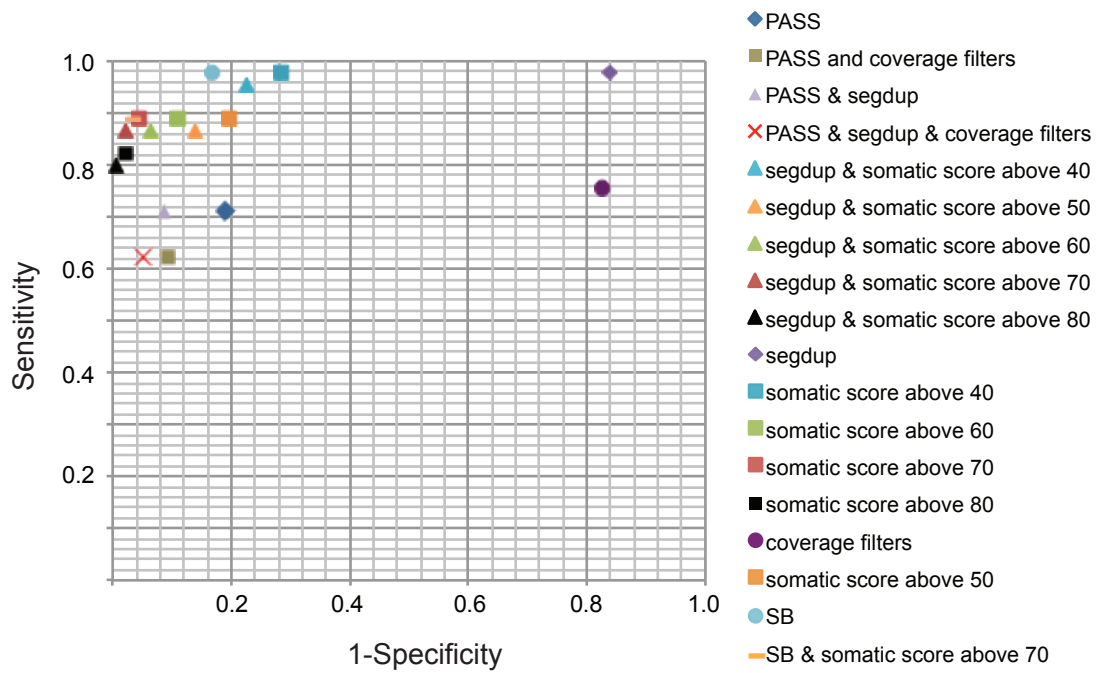

**Suppl. Figure 1. Comparison of somatic SNV filtering strategies.**

Variant quality filtering is denoted as 'PASS' (referring to the quality tag for high quality variants predicted by VQSR). Coverage filtering is defined as depth of coverage  $\geq 10$  reads in diagnosis and remission, and variant allele frequency  $\geq 20\%$  in diagnosis and  $\leq 5\%$  in remission. For repeat region filtering ('segdup' in the legend), all variants in segmental duplication regions are removed. The final filtering strategy used in the rest of this work is indicated with a red square.

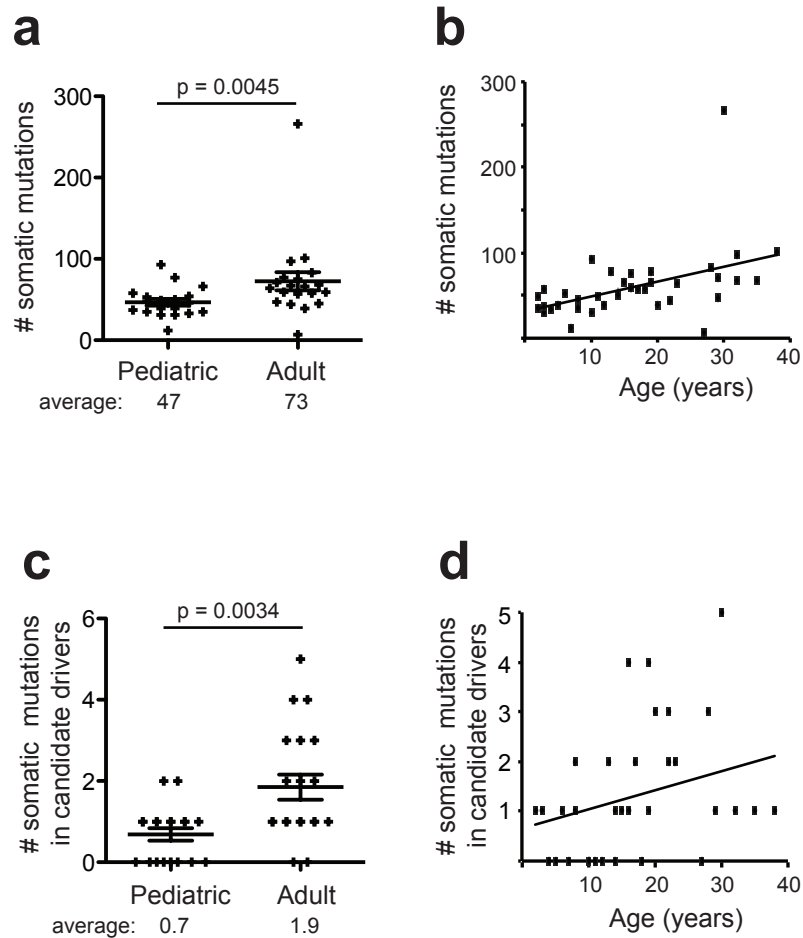

**Suppl. Figure 2. The number of somatic mutations increases with age.**

(a) Box plot showing the number of somatic mutations in pediatric (age  $\leq 15$  years) and in adult (age  $\geq 16$ ) T-ALL samples. Average and s.e.m. is indicated on the plots. The reported p-value tests whether there is a significant difference between mutation number in adults versus children and was calculated using a 2-tailed Wilcoxon signed rank test. Group size pediatric:  $n=19$ ; adult:  $n=20$ . (b) Dot plot representing the number of somatic mutations versus patient age. (c) Box plot showing the number of somatic mutations in candidate driver genes in pediatric and in adult T-ALL patients. Average and s.e.m. is indicated on the plots. The reported p-value tests whether there is a significant difference between mutation number in adults versus children and was calculated using a 2-tailed Wilcoxon signed rank test. Group size pediatric:  $n=19$ ; adult:  $n=20$ . (d) Dot plot representing the number of somatic mutations in candidate driver genes versus patient age.

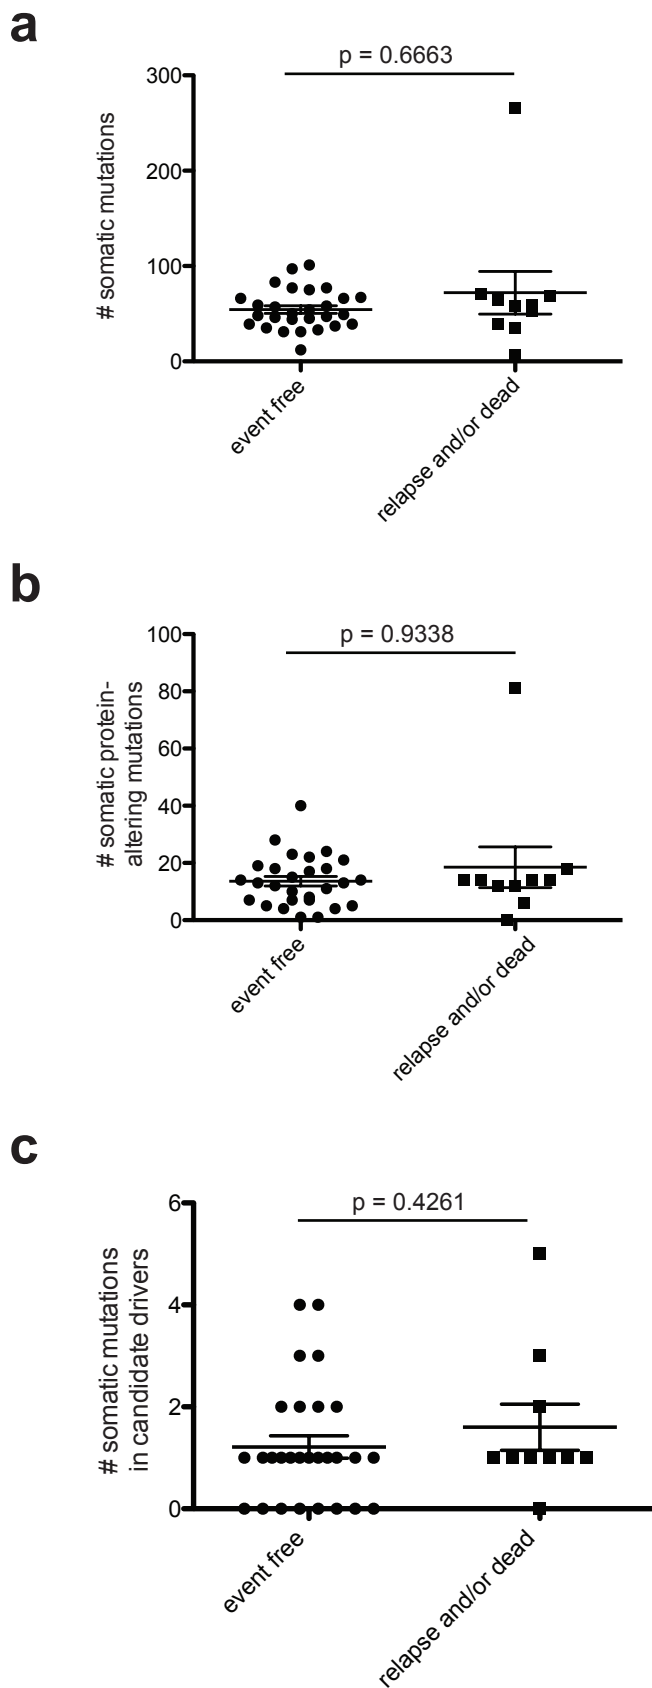

**Suppl. Figure 3. The number of mutations does not correlate with outcome.**

(a-c) Box plots showing number of somatic mutations (a), number of protein-altering somatic mutations (b) and number of somatic mutations in candidate driver genes (c) in patients that did not undergo an event versus patient that relapsed and/or died due to T-ALL. Average and s.e.m. is indicated on the plots. All reported p-values test whether there is a significant difference between mutation number in event free versus relapsed and/or leukemia induced dead patients and were calculated using a 2-tailed Wilcoxon signed rank test. Group size event free: n=28; relapse and/or dead: n=10.

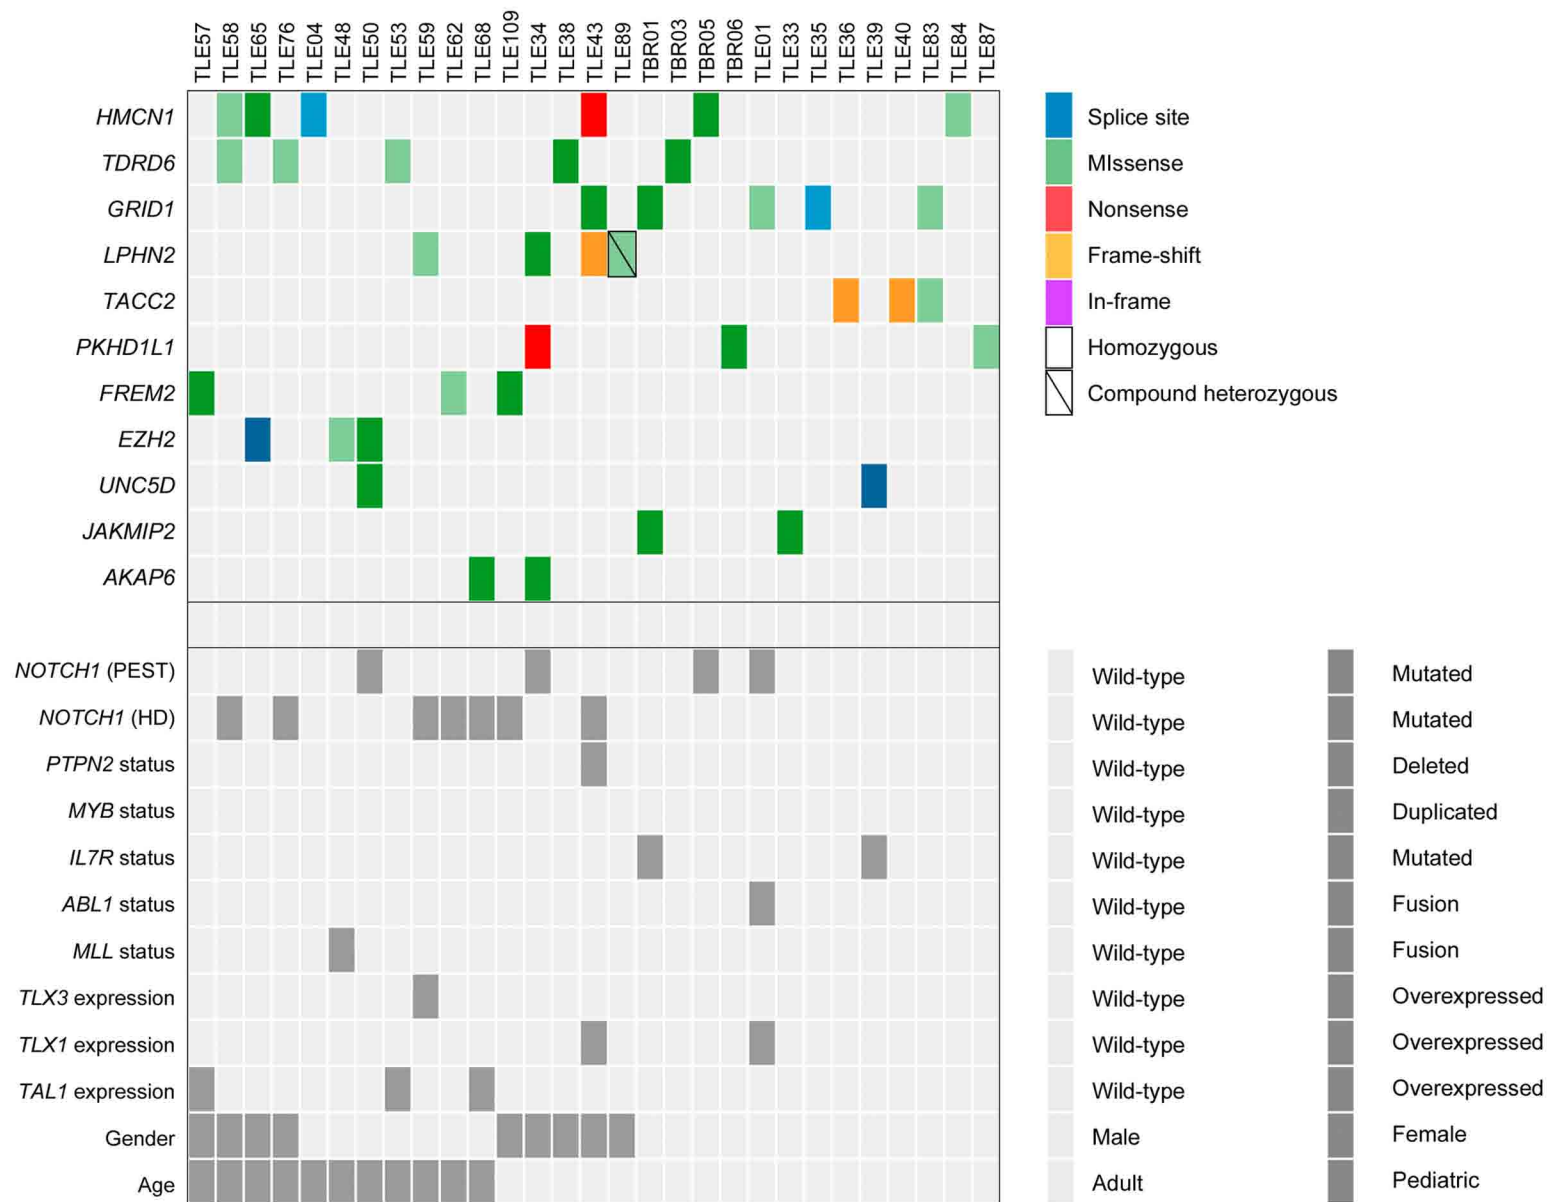

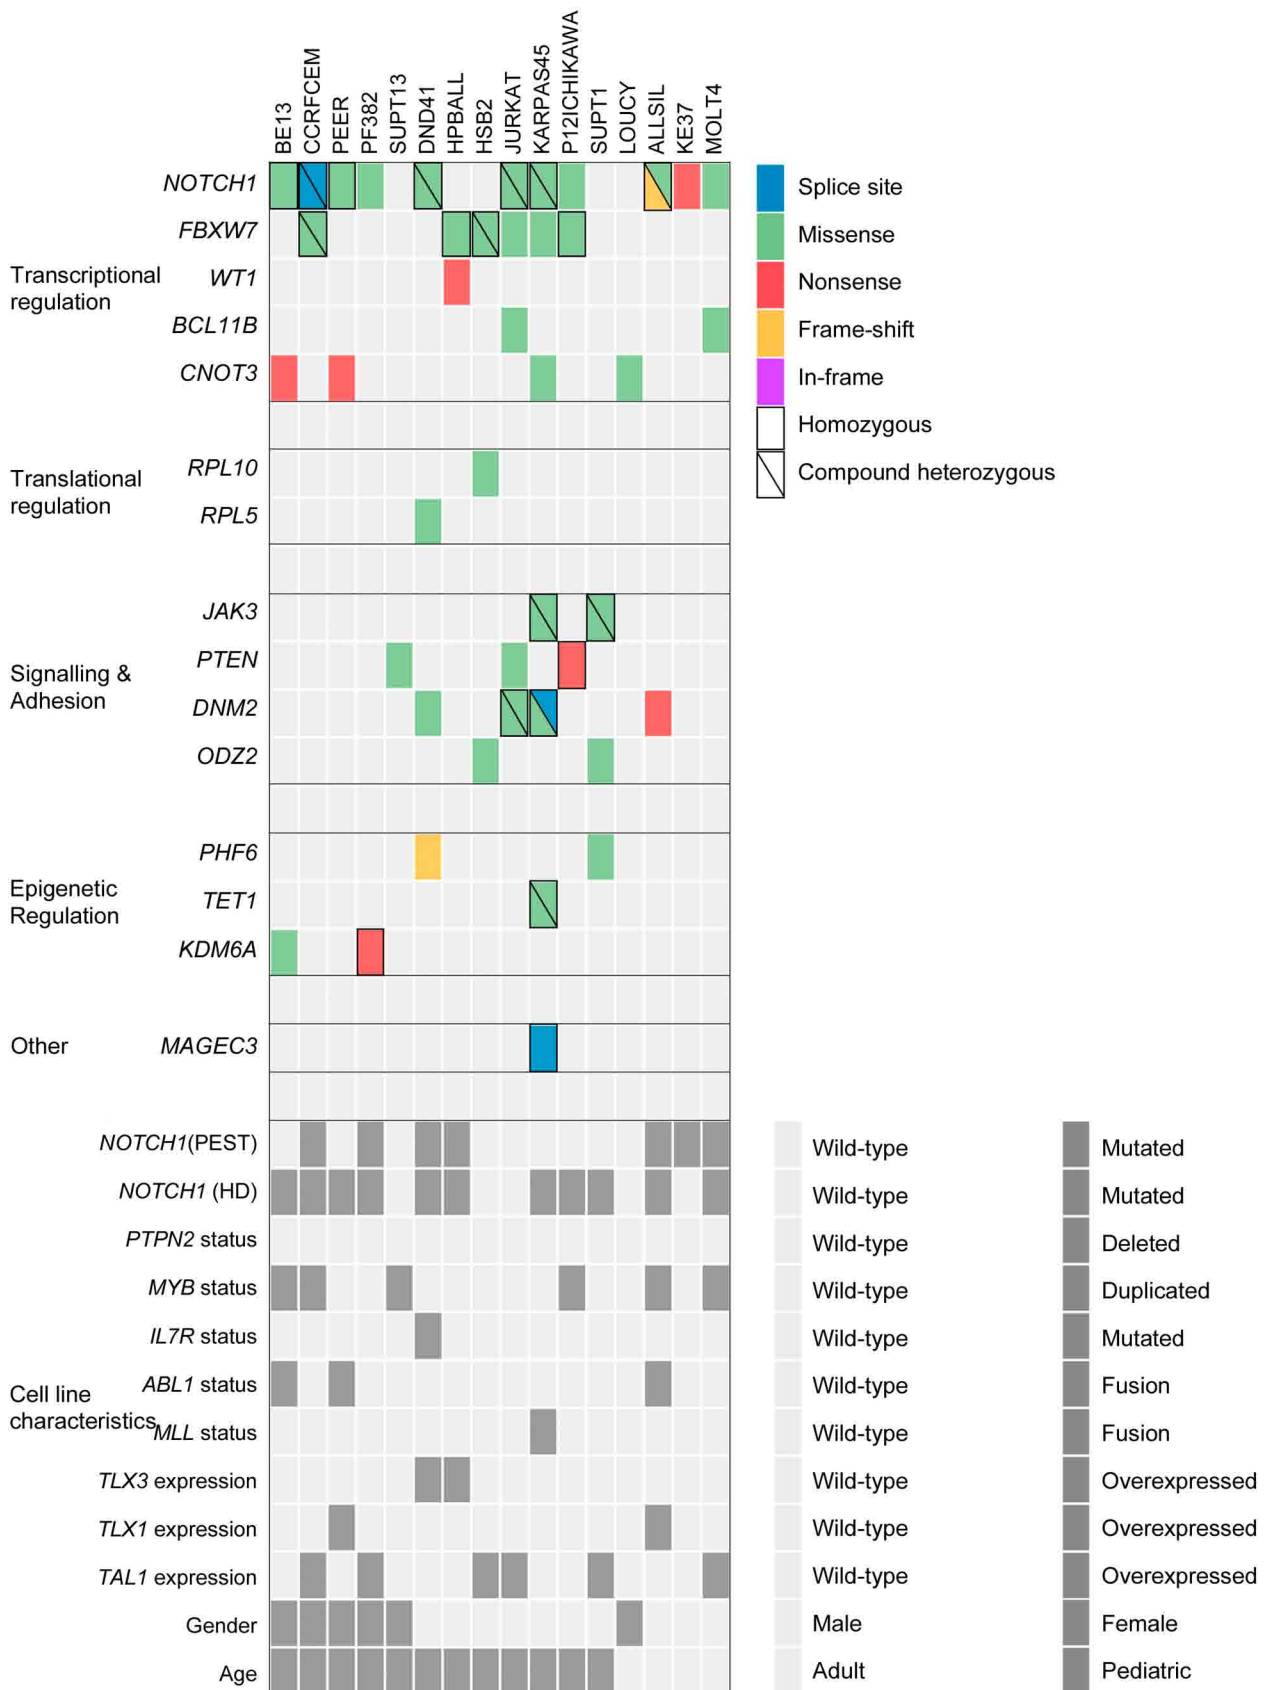



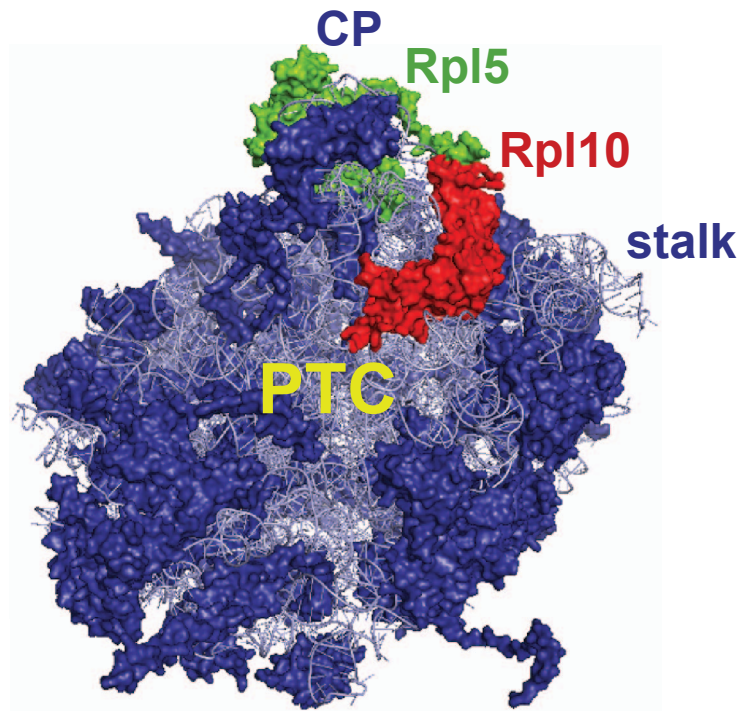

**Suppl. Figure 6. Localization of Rpl10 and Rpl5 proteins in the 60S ribosomal subunit.**

The figure shows the 'crown view' of the rRNA and proteins of the yeast 60S ribosomal subunit with indication of Rpl10 and Rpl5 proteins. PTC: peptidyltransferase center; CP: central protuberance. This model is based on the yeast 3Å crystal structure (PDB entries 3U5E and 3U5D).

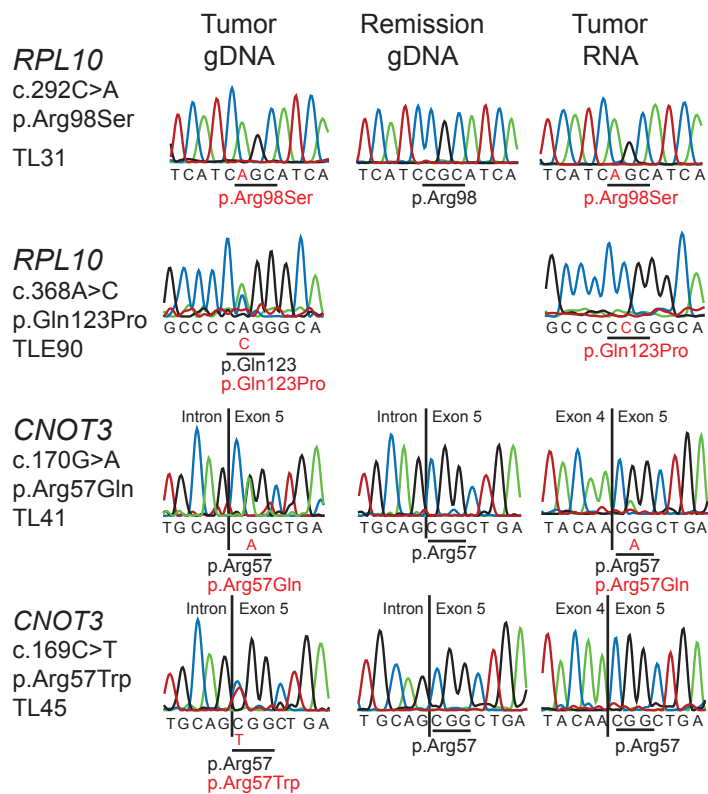

**Suppl. Figure 7. DNA and RNA Sanger results *RPL10* and *CNOT3* mutations.**

Representative chromatograms illustrating presence or absence of indicated *RPL10* or *CNOT3* mutations in diagnostic or remission genomic DNA or diagnostic RNA.

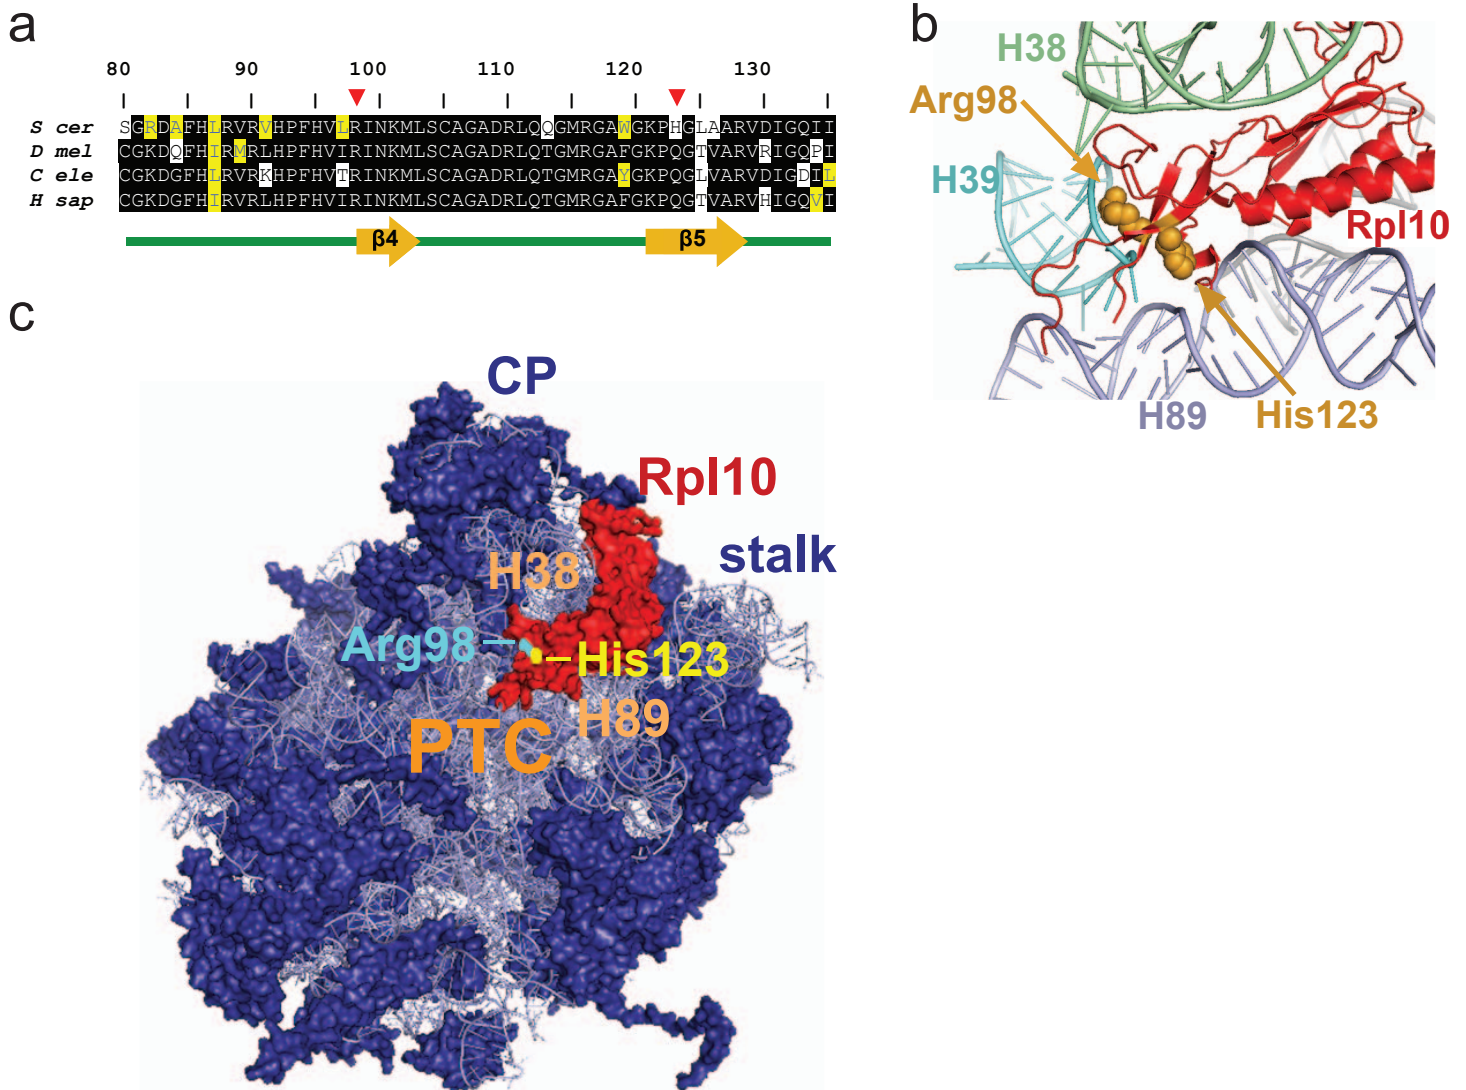

**Suppl. Figure 8. RPL10 mutated residues are close to the catalytic center of the ribosome.**

(a) Alignment of Rpl10 protein sequence from yeast (*S cer*), *Drosophila* (*D mel*), nematodes (*C ele*) and human (*H sap*). Amino acid positions are given and Arg98 and Gln123 (or His123 in yeast) are indicated (▼).  $\beta$ -sheets in the secondary structure of Rpl10 are indicated under the alignment. (b) 3D representation of the region of yeast Rpl10 containing Arg98 and His123 and surrounding rRNA helices H38, H39 and H89. The figure shows that Rpl10 residues Arg98 and His123 are opposing residues in a beta-hairpin loop of Rpl10. (c) Model showing the position of Rpl10 and its residues Arg98 and His123 into the 60S yeast ribosomal subunit ('crown view'). The figure illustrates that Rpl10, and particularly residues Arg98 and His123, are close to the peptidyltransferase center (PTC) in the ribosome. For Reference, rRNA helices H38 and H89 that are also shown in panel (b) are indicated. CP: Central Protuberance. Modeling in panels (b) and (c) is based on the yeast 3Å crystal structure (PDB entries 3U5E and 3U5D).

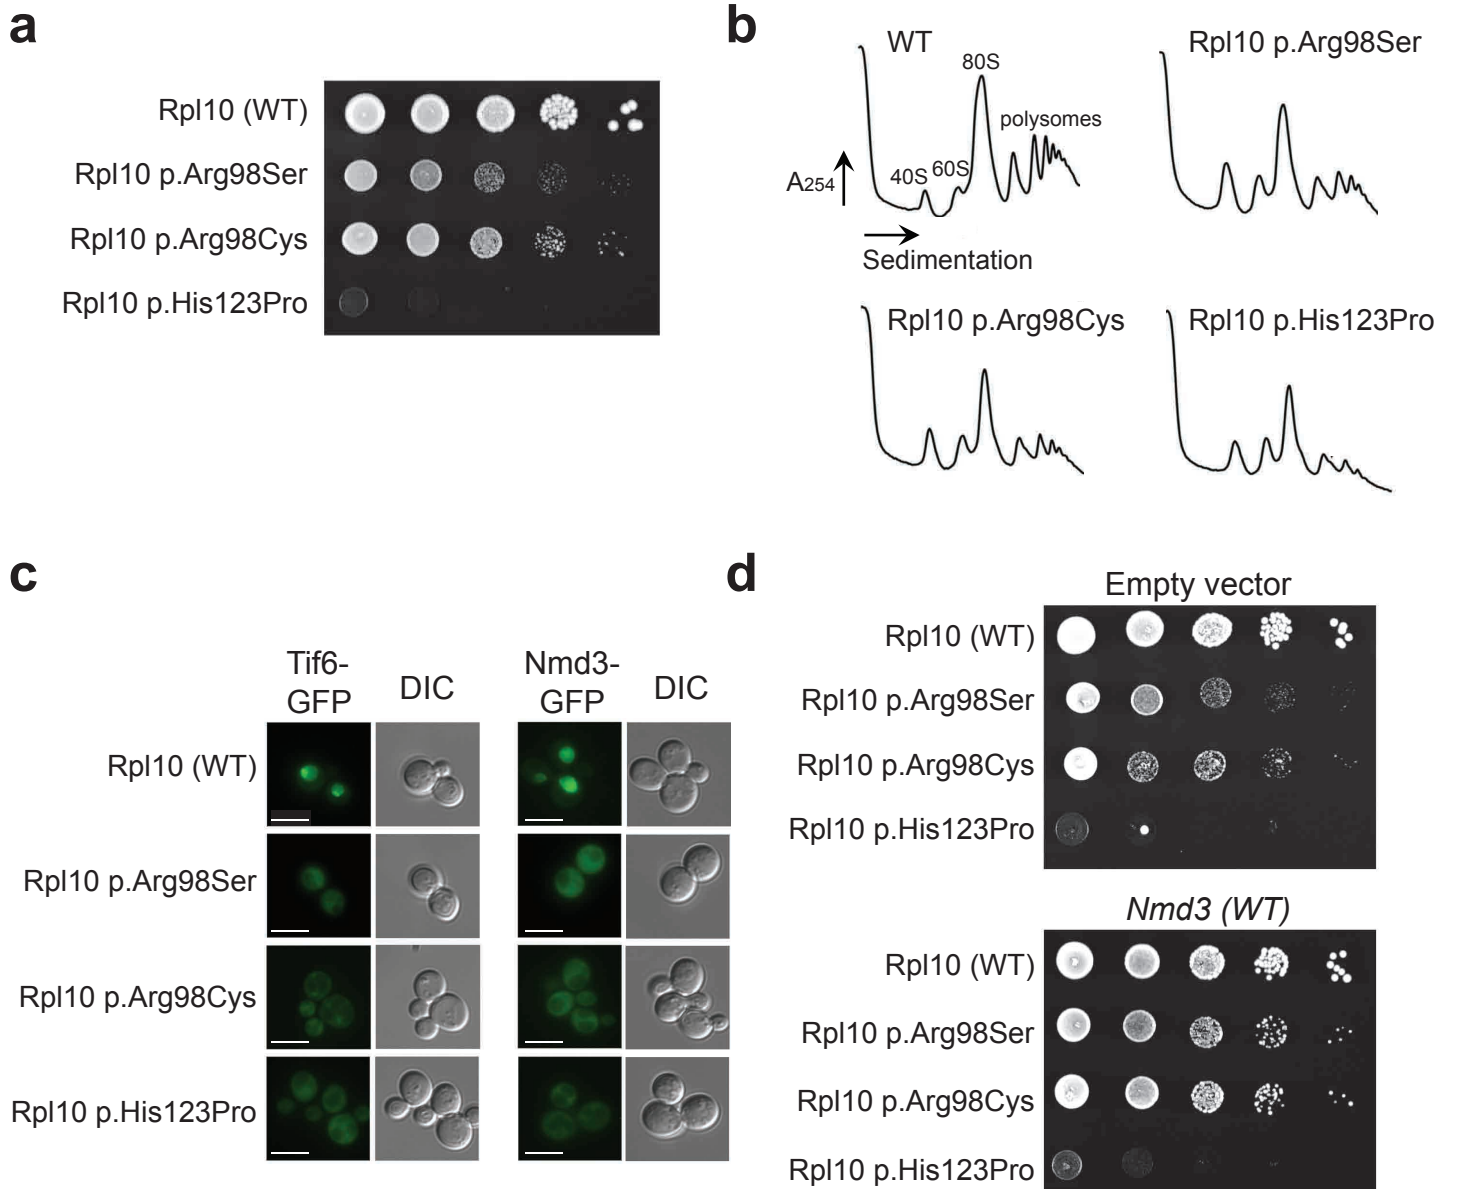

**Suppl. Figure 9. T-ALL associated RPL10 mutants impair proliferation and ribosome biogenesis in yeast cells.** (a) Growth of conditional glucose-repressible Rpl10 yeast cells expressing wild-type (WT) Rpl10, or the T-ALL associated Rpl10 p.Arg98Ser, Rpl10 p.Arg98Cys and Rpl10 p.His123Pro mutants was compared by plating ten-fold serial dilutions. (b) Polysome profiles for Rpl10 WT, Rpl10 p.Arg98Ser, Rpl10 p.Arg98Cys and Rpl10 p.His123Pro yeast cells were carried out as described for Fig 4b with the exception that the Rpl10 alleles were expressed in a glucose-repressible Rpl10 strain shifted to glucose for six hours. (c) Fluorescence microscopy of Tif6-GFP or Nmd3-GFP for the indicated yeast cells was done as described in the legend to Fig 4c. Scale bars: 5  $\mu$ m. (d) Rpl10 WT, Rpl10 p.Arg98Ser, Rpl10 p.Arg98Cys and Rpl10 p.His123Pro yeast cells were transformed with empty vector or vector WT Nmd3. Ten-fold serial dilutions were grown.

**Supplementary Table 1.** Description patient set exome sequencing

|       | Sex | Age | WBC (x10 <sup>9</sup> /l) | immunophenotype | Karyotype                                              | NOTCH1 status | remission sequenced | clinical status          |
|-------|-----|-----|---------------------------|-----------------|--------------------------------------------------------|---------------|---------------------|--------------------------|
| TLE01 | M   | 16  | 455                       | cortical        | 46, XY [20]                                            | PEST          | no                  | dead after relapse       |
| TLE02 | M   | 2   | 108                       | cortical        | 46,XY [20]                                             | HD + PEST     | yes                 | dead after relapse       |
| TLE03 | M   | 20  | 120                       | Pre-T           | 46,XY [10]                                             | HD            | yes                 | dead after relapse       |
| TLE04 | M   | 5   | 10                        | cortical        | 46,XY [21]                                             | wt            | no                  | CR1                      |
| TLE05 | M   | 13  | 5,4                       | mature          | 46,XY [9]                                              | wt            | no                  | CR1                      |
| TLE06 | M   | 18  | 10                        | Pre-T           | 46,XY [8]                                              | HD            | no                  | dead after relapse       |
| TLE07 | M   | 3   | 23                        | cortical        | 46,XY [25]                                             | HD            | yes                 | CR1                      |
| TLE08 | M   | 18  | N/A                       | NA              | 46,XY [10]                                             | HD + PEST     | no                  | NA                       |
| TLE09 | F   | 7   | 61                        | cortical        | 46,XX [7]                                              | HD            | yes                 | CR1                      |
| TLE10 | F   | 32  | 87                        | mature          | 46, XX [10]                                            | wt            | yes                 | dead after relapse       |
| TLE29 | M   | 4   | 5                         | cortical        | 46,XY [7]                                              | wt            | yes                 | CR1                      |
| TLE31 | F   | 5   | 15                        | cortical        | 46, XY, inv(3)(p11;p22) [15]                           | wt            | yes                 | CR1                      |
| TLE32 | M   | 10  | 7                         | cortical        | 46,XY [15]                                             | wt            | yes                 | N/A                      |
| TLE33 | M   | 29  | 18                        | cortical        | 46,XY,+M1(=?+21),+M2,with non-systematic loss [CP5](5) | wt            | yes                 | CR1 after allotransplant |

|       |   |    |      |          |                                                                                                                         |           |     |                          |
|-------|---|----|------|----------|-------------------------------------------------------------------------------------------------------------------------|-----------|-----|--------------------------|
| TLE34 | F | 19 | 1    | Pre-T    | 54-58,XX,-9,-13,-18,-21,+2M1[M1=?der(4)t(1;4)(p31;q26)],+M2,+M3,+M4,+M5,+R,+11-15MAR[CP5] [5]; 46,XX [5]                | PEST      | yes | CR1 after autotransplant |
| TLE35 | M | 41 | 62   | Pre-T    | 46, XY, ADD(1)(p36)[3]/46, XY[12]                                                                                       | wt        | no  | dead after relapse       |
| TLE36 | M | 16 | 57   | cortical | 46,XY [19]                                                                                                              | wt        | yes | CR1                      |
| TLE37 | M | 37 | 59   | mature   | 45,XY,add(4)(p16),del(5)(p13p15),?der(7)(p),del(9)(p12p21),add(11)(p11),del(11)(p11p14),add(14)(p13),-21 [9]; 46,XY [1] | wt        | no  | dead after relapse       |
| TLE38 | F | 22 | 206  | cortical | 46,X,add(X)(q21),del(5)(q12q32),del(7)(q22q33), add(19)(q13)[8]                                                         | wt        | yes | CR1                      |
| TLE39 | M | 17 | 405  | cortical | NA                                                                                                                      | wt        | yes | CR1                      |
| TLE40 | M | 38 | 13   | cortical | 46,XY [5]                                                                                                               | wt        | yes | CR1                      |
| TLE41 | M | 16 | 186  | cortical | 45,X,-Y, t(10;12)(p12;q21)[10]                                                                                          | PEST      | yes | dead after relapse       |
| TLE42 | M | 23 | 81   | cortical | 48, XY, t(3;11)(p12;p15), t(7;10)(q35;q24), t(8;10)(q21;q21), +11, +12 [5]                                              | wt        | yes | dead                     |
| TLE43 | F | 30 | 46   | cortical | 46,XX,add(9)(p13),t(10;14) (q23;q11),del(12)(p12)[1]; 46,XX, idic(9)(p13),t(10;14),del(12) [8]                          | HD        | yes | dead after relapse       |
| TLE44 | F | 29 | 13   | cortical | 46,X,t(X;10)(p23;q23),del(7)(q22q34)[4],del(12)(p11p12)[4],del(17)(q22)[2] [CP5][5]; 46,XX [8]                          | HD + PEST | yes | dead after relapse       |
| TLE45 | M | 22 | 52   | cortical | 46,XY [3]; 46,XY,del(1)(p21p31),ins(6;?)(q22;?),t(10;14)(q25;q11) [3]                                                   | wt        | yes | CR1                      |
| TLE47 | M | 34 | 8    | cortical | NA                                                                                                                      | PEST      | no  | dead after relapse       |
| TLE48 | M | 7  | 28   | c-T-ALL  | 47,XY,add(6)(q27),t(10;11)(q23;q23),+der(10) t(10;11) [7]; 46,XY [3]                                                    | wt        | no  | CR1                      |
| TLE50 | M | 12 | 185  | Pre-T    | 46,XY [25]                                                                                                              | wt        | yes | CR1                      |
| TLE51 | M | 6  | 52   | Pre-T    | 47, XY, del(6)(q21), +8 [12] / 46, XY [4]                                                                               | wt        | yes | dead after relapse       |
| TLE53 | M | 13 | 350  | pre-T    | 46, XY [12]                                                                                                             | wt        | no  | dead                     |
| TLE54 | F | 15 | 8,17 | Cortical | 92,XXXX,DEL(6)(q14q16),del(9)(p11),t(14;20) (q11;p12) [17]; 46, XX [7]                                                  | wt        | yes | CR1                      |
| TLE55 | M | 3  | 162  | cortical | 46,XY [12]                                                                                                              | HD        | yes | CR1                      |

|       |   |    |       |          |                                                                                                                                                                                      |      |     |                          |
|-------|---|----|-------|----------|--------------------------------------------------------------------------------------------------------------------------------------------------------------------------------------|------|-----|--------------------------|
| TLE56 | M | 7  | 251,5 | mature   | 46, XY [33]                                                                                                                                                                          | PEST | no  | CR1                      |
| TLE57 | F | 8  | 123   | mature   | 46, XX, der(19)t(1;19)(q41;p13)[3], 46, XX [12]                                                                                                                                      | wt   | yes | CR1                      |
| TLE58 | F | 9  | 128,5 | mature   | 46,XX,t(1;9)(p13;p21),add(5)(q21),?del(7)(q31q33),<br>der(16)t(1;16)(q21;p11)[6]; 46, XX[2]                                                                                          | HD   | no  | CR1 after allotransplant |
| TLE59 | M | 7  | 3,8   | pre-T    | 47,XY,del(6)(q23q26)[2],+8,del(12)(p12p13),del(13)(q13q21) [4]; 46, XY [6]                                                                                                           | HD   | no  | CR1 after allotransplant |
| TLE60 | M | 3  | 541,2 | pre-T    | 46, XY [20]                                                                                                                                                                          | wt   | yes | dead after relapse       |
| TLE61 | M | 13 | N/A   | NA       | 46, XY [11]                                                                                                                                                                          | wt   | yes | CR1                      |
| TLE62 | M | 7  | N/A   | cortical | 91, XXYY, -3, 4del(9)(p13) [8]; 46, XY, 2del(9)(p13) [1]                                                                                                                             | HD   | no  | CR1                      |
| TLE63 | M | 11 | 18    | pre-T    | 46,XY,der(2).ISH(WCP2+,WCP9P+),der(5)t(5;9)(q33;q31),<br>del(9)(q12q33),der(9)del(9)(p13p22)t(2;9)(q22;q21),<br>der(11)t(9;11)(q?;p15),inv(14)(q11q32) [3]; 46,SL,del(1)(q21q31) [1] | wt   | yes | CR1                      |
| TLE64 | F | 8  | 18    | cortical | 46,XX,del(7)(p12p21) [9]                                                                                                                                                             | wt   | yes | CR1                      |
| TLE65 | F | 14 | 8     | mature   | 45,XX,-3,der(9)t(3;9)(p12;p21) [6]; 46, XX [4]                                                                                                                                       | wt   | yes | CR1                      |
| TLE66 | F | 2  | 248   | cortical | 46,XX [10]                                                                                                                                                                           | HD   | yes | CR1                      |
| TLE67 | M | 14 | 518   | Pre-T    | 46,XY,t(7;9)(p14;q34) [5]; 46,XY,del(6)(q16q24) [3]                                                                                                                                  | HD   | yes | CR1                      |
| TLE68 | M | 10 | 48    | mature   | 46,XY, t(1;14)(p32;q11),t(6;10)(q14;q23), t(8;12)(p11;p12) [6]; 46,XY [4]                                                                                                            | HD   | yes | CR1                      |
| TLE76 | F | 9  | 105   | NA       | NA                                                                                                                                                                                   | HD   | no  | CR1                      |
| TLE78 | M | 19 | 347   | mature   | NA                                                                                                                                                                                   | HD   | no  | dead after relapse       |
| TLE79 | M | 22 | 20    | NA       | 46,XY [20]                                                                                                                                                                           | wt   | no  | dead                     |
| TLE80 | M | 41 | 358   | NA       | NA                                                                                                                                                                                   | HD   | no  | CR1                      |
| TLE82 | F | 19 | 5     | Pre-T    | NA                                                                                                                                                                                   | wt   | no  | CR1                      |
| TLE83 | M | 17 | 173   | NA       | 46,XY,del(6)(q21q25)[4]/46,XY[16] [20]                                                                                                                                               | wt   | no  | dead after relapse       |

|        |    |    |      |                |                                                                                                                                                            |      |     |                          |
|--------|----|----|------|----------------|------------------------------------------------------------------------------------------------------------------------------------------------------------|------|-----|--------------------------|
| TLE84  | M  | 46 | 10   | NA             | 45,XY,add(1)(p13),add(6)(q?24),-8,del(11)(q23),der(12)t(12;18)(q10;q10),-18,+mar1[cp3]/46,XY[3] [6]                                                        | wt   | no  | dead                     |
| TLE85  | M  | 2  | 208  | NA             | 46,XY,add(5)(p13),del(6)(q21q2?5),add(7)(q?32),add(8)(q2?4),add(11)(q21),add(14)(q2?4)[6]/46,XY[4] [10]                                                    | HD   | no  | dead                     |
| TLE87  | M  | 20 | 8    | c-T-ALL        | 52,XY,+?X,+8,+10,+11,+13,+19[11]/46,XY[9] [20]                                                                                                             | HD   | no  | dead after relapse       |
| TLE89  | F  | 72 | 34   | NA             | 40~44,X,-X,del(3)(q21),-5,add(6)(q2?3),add(7)(p1?),-8,-9,add(12)(p13),-13,-14,add(16)(p13),i(17)(q10),+i(17)(q10),add(21)(p11),+1~6mar[cp11]/46,XX[2] [13] | wt   | no  | dead                     |
| TLE 90 | F  | 10 | 30,6 | NA             | NA                                                                                                                                                         | HD   | no  | CR1                      |
| TLE91  | NA | 16 | 4    | immature       | NA                                                                                                                                                         | wt   | no  | CR1                      |
| TLE92  | M  | 23 | 448  | NA             | 46,XY [14]                                                                                                                                                 | wt   | no  | dead after relapse       |
| TLE109 | F  | 28 | 83,6 | Pre-T/cortical | 47, XX,+9,?DEL(22)(Q11),INC[2][2]; 46,XX[15]                                                                                                               | HD   | yes | CR1                      |
| TLE110 | M  | 27 | 89   | cortical       | 46,XY,t(10;14)(q24;q11),DEL(12)(p12)[4]                                                                                                                    | wt   | yes | CR2                      |
| TBR01  | M  | 35 | 8,5  | NA             | 46,XY (20);                                                                                                                                                | wt   | yes | CR1                      |
| TBR03  | M  | 18 | 33   | cortical       | t(1;14)(p32;q11), del(9)(p12) (3); 46,XY (13)                                                                                                              | wt   | yes | CR1                      |
| TBR05  | M  | 32 | 11   | Pre-T          | 46,XY                                                                                                                                                      | PEST | no  | CR1                      |
| TBR06  | M  | 16 | 11   | cortical       | NA                                                                                                                                                         | wt   | yes | CR1                      |
| TBR08  | M  | 19 | 5,2  | pre-T          | 46,XY (4)                                                                                                                                                  | HD   | yes | CR1                      |
| TBR09  | M  | 45 | 7,2  | mature         | NA                                                                                                                                                         | wt   | no  | CR1 after autotransplant |



**Supplementary Table 2.** Average alignment results over 123 samples

|                                                      | Average $\pm$ St. Dev. | Range       |
|------------------------------------------------------|------------------------|-------------|
| Number of high-quality aligned bases (Gbp)           | 7.1 $\pm$ 2.5          | 3.9 – 17.2  |
| Mean target coverage                                 | 109.12 $\pm$ 31.8      | 51.3 - 239  |
| Percentage of bases covered by at least 2 reads (%)  | 95.7 $\pm$ 0.8         | 92.5 – 97.3 |
| Percentage of bases covered by at least 10 reads (%) | 91.0 $\pm$ 2.0         | 81.5 – 95.7 |
| Percentage of bases covered by at least 20 reads (%) | 84.9 $\pm$ 3.8         | 68.7 – 94.1 |

**Supplementary Table 3.** Sequencing and mapping statistics of the 123 samples

|                           | <b>Sample</b> | <b>Average Coverage</b> | <b>Number of HQ aligned bases</b> | <b>%2x</b> | <b>%10x</b> | <b>%20x</b> |
|---------------------------|---------------|-------------------------|-----------------------------------|------------|-------------|-------------|
| Diagnosis-remission pairs | TLE02         | 115,97                  | 6434773318                        | 95,76      | 91,48       | 86,10       |
|                           | TLE02R        | 105,02                  | 7832528909                        | 95,30      | 90,03       | 83,81       |
|                           | TLE03         | 116,49                  | 6552282192                        | 95,28      | 91,08       | 86,02       |
|                           | TLE03R        | 123,52                  | 6977981481                        | 96,24      | 91,93       | 86,52       |
|                           | TLE07         | 116,27                  | 6571887395                        | 95,00      | 90,47       | 85,09       |
|                           | TLE07R        | 119,27                  | 6740263910                        | 94,93      | 90,92       | 86,28       |
|                           | TLE09         | 117,46                  | 6715668652                        | 95,83      | 91,78       | 86,71       |
|                           | TLE09R        | 114,47                  | 6628660943                        | 95,87      | 91,15       | 85,15       |
|                           | TLE10         | 130,20                  | 7421870724                        | 94,55      | 89,68       | 84,31       |
|                           | TLE10R        | 115,87                  | 6811622486                        | 94,57      | 89,63       | 84,07       |
|                           | TLE29         | 208,40                  | 11166444607                       | 97,12      | 94,82       | 92,08       |
|                           | TLE29R        | 140,18                  | 8756733946                        | 96,21      | 93,03       | 89,22       |
|                           | TLE31         | 102,92                  | 5609763248                        | 96,56      | 92,16       | 85,84       |
|                           | TLE31R        | 130,73                  | 9114214164                        | 95,91      | 92,11       | 87,95       |
|                           | TLE32         | 105,34                  | 5841357239                        | 96,50      | 92,09       | 85,99       |
|                           | TLE32R        | 99,88                   | 5540056431                        | 96,44      | 92,13       | 86,07       |
|                           | TLE33         | 108,86                  | 5930415357                        | 96,61      | 92,68       | 87,11       |
|                           | TLE33R        | 77,05                   | 6063512277                        | 96,67      | 92,76       | 87,29       |
|                           | TLE34         | 107,98                  | 9257512617                        | 92,85      | 84,29       | 76,66       |
|                           | TLE34R        | 106,01                  | 8155053405                        | 95,13      | 89,83       | 83,82       |
|                           | TLE36         | 109,54                  | 8436956125                        | 95,77      | 91,95       | 87,42       |
|                           | TLE36R        | 164,90                  | 13801288412                       | 95,90      | 92,01       | 87,94       |
|                           | TLE38         | 113,46                  | 6635778977                        | 96,40      | 92,17       | 86,77       |
|                           | TLE38R        | 118,39                  | 6893839625                        | 95,80      | 91,41       | 86,13       |
|                           | TLE39         | 98,78                   | 5337604507                        | 96,11      | 91,18       | 84,41       |
|                           | TLE39R        | 119,09                  | 6778665723                        | 95,92      | 90,91       | 85,17       |
|                           | TLE40         | 175,66                  | 13870515334                       | 96,08      | 93,14       | 90,30       |
|                           | TLE40R        | 103,03                  | 8471524518                        | 92,94      | 84,63       | 76,97       |
|                           | TLE41         | 97,87                   | 5290970095                        | 96,27      | 91,45       | 84,88       |
|                           | TLE41R        | 97,65                   | 7784769138                        | 95,13      | 89,34       | 82,71       |
|                           | TLE42         | 93,04                   | 7379808751                        | 94,65      | 88,23       | 80,94       |
|                           | TLE42R        | 77,88                   | 5933401140                        | 94,72      | 87,84       | 79,58       |
|                           | TLE43         | 96,00                   | 4119112509                        | 95,57      | 89,22       | 80,35       |
|                           | TLE43R        | 115,00                  | 7067266260                        | 95,99      | 91,31       | 85,59       |
|                           | TLE44         | 157,37                  | 11262196695                       | 97,06      | 94,93       | 92,44       |
|                           | TLE44R        | 199,40                  | 11140664707                       | 97,14      | 95,20       | 92,98       |
|                           | TLE45         | 99,60                   | 5361441689                        | 96,28      | 91,60       | 84,96       |
|                           | TLE45R        | 73,60                   | 6108833952                        | 94,62      | 88,04       | 79,73       |
|                           | TLE50         | 105,84                  | 6232620442                        | 96,52      | 92,20       | 86,58       |
|                           | TLE50R        | 117,57                  | 6737868380                        | 95,84      | 90,38       | 84,22       |
|                           | TLE51         | 204,47                  | 11647824116                       | 96,94      | 94,44       | 91,71       |
|                           | TLE51R        | 103,49                  | 8825090203                        | 94,51      | 88,33       | 81,70       |

|                           |         |            |             |       |       |       |
|---------------------------|---------|------------|-------------|-------|-------|-------|
| Diagnosis-remission pairs | TLE54   | 103,17     | 5592702430  | 96,31 | 92,03 | 86,10 |
|                           | TLE54R  | 101,20     | 7747517288  | 94,86 | 88,94 | 82,31 |
|                           | TLE55   | 104,84     | 5731912169  | 96,48 | 92,13 | 86,15 |
|                           | TLE55R  | 122,28     | 9556978938  | 95,44 | 91,09 | 86,12 |
|                           | TLE57   | 102,24     | 8067777512  | 94,67 | 88,62 | 81,98 |
|                           | TLE57R  | 51,32      | 3926150993  | 92,50 | 81,46 | 68,74 |
|                           | TLE60   | 88,73      | 6933172263  | 93,93 | 89,81 | 84,77 |
|                           | TLE60R  | 92,32      | 7159382496  | 95,02 | 91,52 | 87,26 |
|                           | TLE61   | 81,60      | 4519726087  | 95,79 | 89,91 | 82,11 |
|                           | TLE61R  | 183,82     | 14423403800 | 95,95 | 92,48 | 89,13 |
|                           | TLE63   | 101,73     | 5621508025  | 96,34 | 91,40 | 84,74 |
|                           | TLE63R  | 124,74     | 9417945019  | 95,46 | 91,54 | 87,18 |
|                           | TLE64   | 105,47     | 5779977325  | 96,30 | 91,68 | 85,52 |
|                           | TLE64R  | 122,61     | 9343211056  | 95,77 | 92,36 | 88,57 |
|                           | TLE65   | 53,32      | 4255758220  | 93,72 | 86,70 | 76,32 |
|                           | TLE65R  | 126,19     | 7401926715  | 96,17 | 91,77 | 86,52 |
|                           | TLE66   | 239,04     | 17226531022 | 97,26 | 95,65 | 94,07 |
|                           | TLE66R  | 224,95     | 16590397799 | 97,34 | 95,71 | 94,08 |
|                           | TLE67   | 108,78     | 6013449699  | 96,49 | 92,16 | 86,31 |
|                           | TLE67R  | 125,59     | 9333634272  | 95,21 | 92,41 | 89,38 |
|                           | TLE68   | 95,51      | 5588455253  | 96,12 | 90,74 | 83,61 |
|                           | TLE68R  | 115,01     | 6467764161  | 96,47 | 91,86 | 86,20 |
|                           | TLE109  | 84,30      | 6641112642  | 95,37 | 89,93 | 82,64 |
|                           | TLE109R | 124,91     | 9429949759  | 96,42 | 93,47 | 89,67 |
|                           | TLE110  | 91,46      | 6705886758  | 95,83 | 91,95 | 86,35 |
|                           | TLE110R | 114,73     | 8288756821  | 96,05 | 92,80 | 88,57 |
|                           | TBR01   | 102,01     | 5666167563  | 96,40 | 91,72 | 85,31 |
|                           | TBR01R  | 89,52      | 6363460796  | 96,13 | 92,24 | 86,45 |
|                           | TBR03   | 103,01     | 5423082617  | 96,40 | 91,63 | 85,04 |
|                           | TBR03R  | 66,48      | 6489214656  | 96,09 | 90,17 | 81,05 |
|                           | TBR05   | 109,52     | 6335234031  | 96,67 | 92,80 | 87,41 |
|                           | TBR05R2 | 135,72     | 9666385539  | 96,29 | 93,00 | 89,01 |
|                           | TBR06   | 81,02      | 5722009683  | 95,73 | 90,71 | 83,30 |
|                           | TBR06R  | 92,11      | 6642728915  | 95,81 | 91,57 | 85,43 |
| TBR08                     | 83,10   | 5910976132 | 95,92       | 91,53 | 84,91 |       |
| TBR08R                    | 66,56   | 6026709986 | 96,03       | 90,01 | 80,80 |       |
| Diagnosis-only            | TLE01   | 119,25     | 6734469242  | 96,14 | 91,92 | 86,77 |
|                           | TLE04   | 144,52     | 8150064536  | 96,08 | 92,88 | 89,06 |
|                           | TLE05   | 116,68     | 6879914028  | 95,63 | 90,14 | 84,06 |
|                           | TLE06   | 116,21     | 6722108090  | 95,43 | 90,62 | 84,87 |
|                           | TLE08   | 121,48     | 6852485845  | 95,67 | 90,65 | 84,82 |
|                           | TLE35   | 112,95     | 9091739373  | 94,64 | 91,48 | 88,26 |
|                           | TLE37   | 96,02      | 5203144234  | 96,31 | 91,35 | 84,45 |
|                           | TLE47   | 97,89      | 5264105494  | 96,23 | 91,26 | 84,40 |
|                           | TLE48   | 104,75     | 5658759914  | 96,37 | 91,75 | 85,41 |
| TLE53                     | 104,34  | 5617924241 | 96,44       | 91,91 | 85,66 |       |

|                |            |            |             |            |       |       |
|----------------|------------|------------|-------------|------------|-------|-------|
| Diagnosis-only | TLE56      | 105,08     | 5675514463  | 96,52      | 92,13 | 86,06 |
|                | TLE58      | 163,72     | 11224449086 | 97,09      | 94,99 | 92,52 |
|                | TLE59      | 100,32     | 5279422808  | 96,31      | 91,29 | 84,38 |
|                | TLE62      | 98,44      | 5301124302  | 96,15      | 90,92 | 83,98 |
|                | TLE76      | 118,42     | 8982789768  | 93,25      | 90,03 | 85,92 |
|                | TLE78      | 136,14     | 10393955120 | 96,35      | 93,56 | 90,06 |
|                | TLE79      | 106,37     | 8201070607  | 96,23      | 92,86 | 88,18 |
|                | TLE80      | 76,32      | 5483240222  | 95,66      | 90,89 | 83,52 |
|                | TLE82      | 83,41      | 5988879782  | 95,74      | 91,54 | 85,34 |
|                | TLE83      | 112,15     | 7956463149  | 96,19      | 93,10 | 88,83 |
|                | TLE84      | 131,19     | 9659821995  | 96,39      | 93,75 | 90,38 |
|                | TLE85      | 111,12     | 8198682650  | 96,14      | 92,51 | 87,65 |
|                | TLE87      | 74,93      | 5472259002  | 95,59      | 90,16 | 82,10 |
|                | TLE89      | 110,93     | 7893400404  | 95,82      | 92,08 | 87,13 |
|                | TLE90      | 98,52      | 7669801970  | 94,83      | 89,06 | 82,37 |
|                | TLE91      | 107,25     | 7804471198  | 95,83      | 92,00 | 86,91 |
|                | TLE92      | 71,18      | 5076931079  | 95,40      | 90,00 | 81,86 |
|                | TBR09      | 75,83      | 5620548171  | 95,74      | 90,17 | 81,98 |
|                | Cell lines | BE13       | 80,02       | 4389579074 | 95,96 | 89,90 |
| HSB2           |            | 76,83      | 4111507226  | 96,09      | 90,23 | 81,25 |
| KARPAS45       |            | 78,83      | 4299191762  | 96,04      | 89,61 | 80,38 |
| SUPT1          |            | 83,03      | 4423428632  | 95,84      | 89,65 | 81,07 |
| ALLSIL         |            | 80,40      | 4268499678  | 95,85      | 89,61 | 80,85 |
| DND41          |            | 81,44      | 4351377003  | 95,88      | 89,86 | 81,38 |
| HPBALL         |            | 136,69     | 7846101056  | 94,80      | 90,85 | 86,41 |
| JURKAT         |            | 79,18      | 4284636749  | 95,95      | 89,91 | 81,07 |
| KE37           |            | 77,62      | 4104120108  | 95,98      | 89,00 | 79,05 |
| MOLT4          |            | 77,23      | 4260634262  | 95,60      | 88,66 | 79,35 |
| P12CHIKAWA     |            | 77,56      | 4257956827  | 95,75      | 89,49 | 80,51 |
| PEER           |            | 78,57      | 4222938259  | 95,36      | 88,31 | 79,06 |
| SUPT13         |            | 76,15      | 4105548930  | 95,79      | 89,39 | 80,12 |
| TALL1          |            | 76,07      | 4220878568  | 95,81      | 89,34 | 80,16 |
| PF382          |            | 77,69      | 4142895290  | 95,48      | 88,91 | 79,89 |
| CCRFCEM        |            | 116,08     | 6657193739  | 95,69      | 91,56 | 86,36 |
| LOUCY          | 130,34     | 7589136310 | 95,45       | 91,57      | 87,11 |       |

**Supplementary Table 4.** Detected SNV and INDEL numbers

**Supplementary Table 4A.** Number of somatic SNVs and INDELS observed in 39 samples

| <b>Sample</b> | <b># somatic SNVs</b> | <b># somatic INDELS</b> | <b>Total # of somatic variations</b> | <b>#of protein altering somatic SNVs</b> | <b>#of protein altering somatic INDELS</b> | <b>Total # of protein altering somatic variations</b> |
|---------------|-----------------------|-------------------------|--------------------------------------|------------------------------------------|--------------------------------------------|-------------------------------------------------------|
| TLE02         | 28                    | 7                       | 35                                   | 6                                        | 0                                          | 6                                                     |
| TLE03         | 35                    | 4                       | 39                                   | 13                                       | 1                                          | 14                                                    |
| TLE07         | 4                     | 27                      | 31                                   | 0                                        | 5                                          | 5                                                     |
| TLE09         | 5                     | 7                       | 12                                   | 0                                        | 1                                          | 1                                                     |
| TLE10         | 51                    | 17                      | 68                                   | 14                                       | 4                                          | 18                                                    |
| TLE29         | 24                    | 9                       | 33                                   | 1                                        | 0                                          | 1                                                     |
| TLE31         | 37                    | 2                       | 39                                   | 4                                        | 0                                          | 4                                                     |
| TLE32         | 9                     | 84                      | 93                                   | 0                                        | 9                                          | 9                                                     |
| TLE33         | 40                    | 7                       | 47                                   | 17                                       | 1                                          | 18                                                    |
| TLE34         | 66                    | 153                     | 66                                   | 19                                       | 61                                         | 19                                                    |
| TLE36         | 27                    | 32                      | 59                                   | 6                                        | 4                                          | 10                                                    |
| TLE38         | 33                    | 12                      | 45                                   | 17                                       | 5                                          | 22                                                    |
| TLE39         | 53                    | 5                       | 58                                   | 20                                       | 1                                          | 21                                                    |
| TLE40         | 38                    | 63                      | 101                                  | 0                                        | 14                                         | 14                                                    |
| TLE41         | 53                    | 6                       | 59                                   | 11                                       | 1                                          | 12                                                    |
| TLE42         | 64                    | 253                     | 64                                   | 14                                       | 27                                         | 14                                                    |
| TLE43         | 250                   | 16                      | 266                                  | 76                                       | 5                                          | 81                                                    |
| TLE44         | 46                    | 25                      | 71                                   | 12                                       | 2                                          | 14                                                    |
| TLE45         | 37                    | 7                       | 44                                   | 10                                       | 2                                          | 12                                                    |
| TLE50         | 30                    | 9                       | 39                                   | 13                                       | 0                                          | 13                                                    |
| TLE51         | 40                    | 13                      | 53                                   | 10                                       | 4                                          | 14                                                    |
| TLE54         | 61                    | 5                       | 66                                   | 13                                       | 1                                          | 14                                                    |
| TLE55         | 35                    | 2                       | 37                                   | 8                                        | 0                                          | 8                                                     |
| TLE57         | 35                    | 316                     | 35                                   | 13                                       | 103                                        | 13                                                    |
| TLE60         | 30                    | 28                      | 58                                   | 6                                        | 6                                          | 12                                                    |
| TLE61         | 74                    | 3                       | 77                                   | 15                                       | 0                                          | 15                                                    |

\* the INDEL calls from these samples are excluded from further analysis

**Supplementary Table 4A (continued).** Number of somatic SNVs and INDELs observed in 39 samples

| <b>Sample</b> | <b># somatic SNVs</b> | <b># somatic INDELs</b> | <b>Total # of somatic variations</b> | <b>#of protein altering somatic SNVs</b> | <b>#of protein altering somatic INDELs</b> | <b>Total # of protein altering somatic variations</b> |
|---------------|-----------------------|-------------------------|--------------------------------------|------------------------------------------|--------------------------------------------|-------------------------------------------------------|
| TLE63         | 44                    | 5                       | 49                                   | 4                                        | 3                                          | 7                                                     |
| TLE64         | 44                    | 2                       | 46                                   | 11                                       | 0                                          | 11                                                    |
| TLE65         | 35                    | 19                      | 54                                   | 6                                        | 1                                          | 7                                                     |
| TLE66         | 34                    | 14                      | 48                                   | 2                                        | 3                                          | 5                                                     |
| TLE67         | 47                    | 3                       | 50                                   | 7                                        | 0                                          | 7                                                     |
| TLE68         | 23                    | 8                       | 31                                   | 3                                        | 1                                          | 4                                                     |
| TLE109        | 69                    | 14                      | 83                                   | 20                                       | 4                                          | 24                                                    |
| TLE110        | 0                     | 7                       | 7                                    | 0                                        | 0                                          | 0                                                     |
| TBR01         | 63                    | 4                       | 67                                   | 26                                       | 2                                          | 28                                                    |
| TBR03         | 52                    | 5                       | 57                                   | 17                                       | 0                                          | 17                                                    |
| TBR05         | 86                    | 11                      | 97                                   | 37                                       | 3                                          | 40                                                    |
| TBR06         | 45                    | 30                      | 75                                   | 11                                       | 7                                          | 18                                                    |
| TBR08         | 63                    | 14                      | 77                                   | 20                                       | 3                                          | 23                                                    |

**Supplementary Table 4B.** Number of SNVs and INDELs observed in 28 diagnosis-only samples

| <b>Sample</b> | <b>#of SNVs</b> | <b>#of INDELs</b> | <b>Total # of variation</b> | <b>#of protein altering SNVs</b> | <b>#of protein altering INDELs</b> | <b>Total # of protein altering variations</b> |
|---------------|-----------------|-------------------|-----------------------------|----------------------------------|------------------------------------|-----------------------------------------------|
| TLE01         | 3683            | 58                | 3741                        | 274                              | 7                                  | 281                                           |
| TLE04         | 3433            | 44                | 3477                        | 179                              | 6                                  | 185                                           |
| TLE05         | 3959            | 45                | 4004                        | 193                              | 8                                  | 201                                           |
| TLE06         | 3602            | 66                | 3668                        | 201                              | 12                                 | 213                                           |
| TLE08         | 3791            | 42                | 3833                        | 198                              | 4                                  | 202                                           |
| TLE35         | 12118           | 132               | 12250                       | 280                              | 11                                 | 291                                           |
| TLE37         | 5704            | 32                | 5736                        | 256                              | 6                                  | 262                                           |
| TLE47         | 5983            | 40                | 6023                        | 263                              | 7                                  | 270                                           |
| TLE48         | 9229            | 50                | 9279                        | 298                              | 5                                  | 303                                           |
| TLE53         | 6040            | 40                | 6080                        | 271                              | 2                                  | 273                                           |

**Supplementary Table 4B (continued).** Number of SNVs and INDELS observed in 28 diagnosis-only samples

| <b>Sample</b> | <b>#of SNVs</b> | <b>#of INDELS</b> | <b>Total # of variation</b> | <b>#of protein altering SNVs</b> | <b>#of protein altering INDELS</b> | <b>Total # of protein altering variations</b> |
|---------------|-----------------|-------------------|-----------------------------|----------------------------------|------------------------------------|-----------------------------------------------|
| TLE56         | 6306            | 49                | 6355                        | 303                              | 6                                  | 309                                           |
| TLE58         | 14013           | 114               | 14127                       | 401                              | 18                                 | 419                                           |
| TLE59         | 8323            | 33                | 8356                        | 333                              | 8                                  | 341                                           |
| TLE62         | 5326            | 47                | 5373                        | 232                              | 6                                  | 238                                           |
| TLE76         | 16973           | 64                | 17037                       | 262                              | 5                                  | 267                                           |
| TLE78         | 14446           | 124               | 14570                       | 251                              | 12                                 | 263                                           |
| TLE79         | 9487            | 108               | 9595                        | 194                              | 16                                 | 210                                           |
| TLE80         | 5052            | 80                | 5132                        | 211                              | 8                                  | 219                                           |
| TLE82         | 5922            | 86                | 6008                        | 221                              | 8                                  | 229                                           |
| TLE83         | 6097            | 117               | 6214                        | 212                              | 15                                 | 227                                           |
| TLE84         | 8393            | 123               | 8516                        | 236                              | 18                                 | 254                                           |
| TLE85         | 8717            | 113               | 8830                        | 219                              | 11                                 | 230                                           |
| TLE87         | 4769            | 77                | 4846                        | 188                              | 8                                  | 196                                           |
| TLE89         | 8113            | 110               | 8223                        | 236                              | 15                                 | 251                                           |
| TLE90         | 25753           | 494               | 26247                       | 996                              | 117                                | 1113                                          |
| TLE91         | 8047            | 102               | 8149                        | 217                              | 10                                 | 227                                           |
| TLE92         | 5400            | 90                | 5490                        | 212                              | 10                                 | 222                                           |
| TBR09         | 5489            | 100               | 5589                        | 307                              | 8                                  | 315                                           |

**Supplementary Table 4C.** Number of SNVs and INDELS observed in 17 T-ALL cell lines

| <b>Sample</b> | <b>#of SNVs</b> | <b>#of INDELS</b> | <b>Total # of variation</b> | <b>#of protein altering SNVs</b> | <b>#of protein altering INDELS</b> | <b>Total # of protein altering variations</b> |
|---------------|-----------------|-------------------|-----------------------------|----------------------------------|------------------------------------|-----------------------------------------------|
| BE13          | 7127            | 58                | 7185                        | 553                              | 17                                 | 570                                           |
| HSB2          | 10400           | 281               | 10681                       | 1522                             | 162                                | 1684                                          |
| KARPAS45      | 23897           | 110               | 24007                       | 6094                             | 43                                 | 6137                                          |
| SUPT1         | 18056           | 371               | 18427                       | 3481                             | 211                                | 3692                                          |
| ALLSIL        | 6099            | 52                | 6151                        | 424                              | 11                                 | 435                                           |

**Supplementary Table 4C (continued).** Number of SNVs and INDELs observed in 17 T-ALL cell lines

| <b>Sample</b> | <b>#of SNVs</b> | <b>#of INDELs</b> | <b>Total # of variation</b> | <b>#of protein altering SNVs</b> | <b>#of protein altering INDELs</b> | <b>Total # of protein altering variations</b> |
|---------------|-----------------|-------------------|-----------------------------|----------------------------------|------------------------------------|-----------------------------------------------|
| DND41         | 13220           | 230               | 13450                       | 2295                             | 122                                | 2417                                          |
| HPBALL        | 4772            | 49                | 4821                        | 519                              | 13                                 | 532                                           |
| JURKAT        | 21269           | 517               | 21786                       | 4627                             | 309                                | 4936                                          |
| KE37          | 5863            | 50                | 5913                        | 296                              | 8                                  | 304                                           |
| MOLT4         | 9195            | 123               | 9318                        | 1190                             | 47                                 | 1237                                          |
| U2ICHIKAW     | 5475            | 54                | 5529                        | 405                              | 11                                 | 416                                           |
| PEER          | 6342            | 38                | 6380                        | 420                              | 7                                  | 427                                           |
| SUPT13        | 4932            | 50                | 4982                        | 268                              | 11                                 | 279                                           |
| TALL1         | 6343            | 38                | 6381                        | 347                              | 12                                 | 359                                           |
| PF382         | 9640            | 63                | 9703                        | 1705                             | 18                                 | 1723                                          |
| CCRFCM        | 12838           | 544               | 13382                       | 2735                             | 234                                | 2969                                          |
| LOUCY         | 4185            | 63                | 4248                        | 292                              | 9                                  | 301                                           |



**Supplementary Table 6.** 20 significantly mutated genes

| Gene              | SNVs | Indels | P-value_FCPT | P-value_LRT | P-value_CT  | FDR_FCPT    | FDR_LRT     | FDR_CT      |
|-------------------|------|--------|--------------|-------------|-------------|-------------|-------------|-------------|
| <i>PHF6</i>       | 6    | 3      | 0            | 0           | 0           | 0           | 0           | 0           |
| <i>FBXW7</i>      | 5    | 0      | 2,57E-07     | 3,96E-12    | 6,24E-12    | 0,002407843 | 3,72E-08    | 5,85E-08    |
| <i>WT1</i>        | 1    | 2      | 0,00073945   | 9,05E-08    | 1,13E-07    | 1           | 0,000566306 | 0,00036233  |
| <i>JAK3</i>       | 3    | 1      | 0,000233854  | 2,28E-07    | 7,40E-08    | 1           | 0,001071297 | 0,00036233  |
| <i>DNM2</i>       | 3    | 1      | 0,000302891  | 3,18E-07    | 1,01E-07    | 1           | 0,001101975 | 0,00036233  |
| <i>PTEN</i>       | 2    | 1      | 0,000693405  | 7,65E-07    | 1,16E-07    | 1           | 0,001794413 | 0,00036233  |
| <i>CNOT3</i>      | 3    | 1      | 0,000638879  | 9,11E-07    | 2,11E-07    | 1           | 0,001899338 | 0,000554231 |
| <i>NOTCH1</i>     | 4    | 0      | 0,000401731  | 3,15E-06    | 2,36E-07    | 1           | 0,004554007 | 0,000554231 |
| <i>BCL11B</i>     | 3    | 0      | 0,001866336  | 3,52E-07    | 5,94E-07    | 1           | 0,001101975 | 0,001134205 |
| <i>TET1</i>       | 2    | 2      | 0,000967204  | 1,59E-06    | 6,04E-07    | 1           | 0,002987512 | 0,001134205 |
| <i>KDM6A</i>      | 1    | 2      | 0,002808411  | 6,23E-07    | 1,19E-06    | 1           | 0,001670034 | 0,002029813 |
| <i>PPP1R15A</i> * | 0    | 2      | 0,034115052  | 2,13E-06    | 2,12E-05    | 1           | 0,003641867 | 0,03323959  |
| <i>ODZ2</i>       | 3    | 0      | 0,017372204  | 1,10E-05    | 2,36E-05    | 1           | 0,013784452 | 0,034006298 |
| <i>TLR1</i>       | 1    | 1      | 0,039179024  | 3,38E-05    | 2,63E-05    | 1           | 0,037312701 | 0,035324464 |
| <i>RPL10</i>      | 2    | 0      | 0,040560182  | 2,94E-06    | 3,99E-05    | 1           | 0,004554007 | 0,049932595 |
| <i>ST8SIA2</i> *  | 2    | 0      | 0,070211284  | 8,37E-06    | 1,06E-04    | 1           | 0,011218891 | 0,124716068 |
| <i>RPL5</i>       | 2    | 0      | 0,072064094  | 1,03E-04    | 1,32E-04    | 1           | 0,087716644 | 0,145751954 |
| <i>FAM55A</i> *   | 1    | 0      | 0,250917229  | 1,00E-04    | 1,51E-04    | 1           | 0,087716644 | 0,157793458 |
| <i>MAGEC3</i>     | 2    | 0      | 0,097310584  | 1,60E-05    | 0,000164696 | 1           | 0,018784018 | 0,162719158 |
| <i>MTMR8</i> *    | 2    | 0      | 0,100203907  | 0,000190863 | 0,000176446 | 1           | 0,143315041 | 0,165612115 |

\* the gene is not recurrently mutated across different samples (the gene has either one mutation, or several mutations in the same sample).

**Supplementary Table 8.** Patient characteristics *CNOT3* (NM\_014516.3) mutated cases

| patient | cohort       | nucleotide change | amino acid change | Somatic | sex | age (y) | WBC (x10 <sup>9</sup> /l) | blast % | immune phenotype | karyotype                                                                                        | CDKN2A* |
|---------|--------------|-------------------|-------------------|---------|-----|---------|---------------------------|---------|------------------|--------------------------------------------------------------------------------------------------|---------|
| TLE39   | exome        | c.170G>A          | p.Arg57Gln        | yes     | M   | 17      | 405                       | 93      | cortical         | NA                                                                                               | NA      |
| TLE41   | exome        | c.169C>T          | p.Arg57Trp        | yes     | M   | 16      | 186                       | 97      | cortical         | 45,X,-Y, t(10;12)(p12;q21)[10]                                                                   | NA      |
| TLE43   | exome        | c.13_14insG       | p.Arg5Fs          | yes     | F   | 30      | 46                        | 93      | cortical         | 46,XX,add(9)(p13),t(10;14)(q23;q11),del(12)(p12)[1];<br>46,XX, idic(9)(p13),t(10;14),del(12) [8] | -/+     |
| TLE45   | exome        | c.169C>T          | p.Arg57Trp        | yes     | M   | 22      | 52                        | 59      | cortical         | 46,XY [3];<br>46,XY,del(1)(p21p31),ins(6;?)(q22;?),t(10;14)(q25;q11) [3]                         | NA      |
| TL21    | confirmation | c.477delC         | p.Asp159Fs        | NA      | M   | 31      | 131                       | 99      | cortical         | NA                                                                                               | +/-     |
| TL41    | confirmation | c.170G>A          | p.Arg57Gln        | yes     | M   | 4       | 260                       | 93      | cortical         | 46,XY[8]/ failure                                                                                | -/-     |
| TL45    | confirmation | c.169C>T          | p.Arg57Trp        | yes     | F   | 43      | 159                       | 100     | cortical         | 46,XX,inv(7)(p15q34)[9]                                                                          | -/-     |
| ALEK127 | confirmation | c.170G>A          | p.Arg57Gln        | NA      | M   | 42      | NA                        | NA      | NA               | NA                                                                                               | NA      |

\* no deletion on 4K CGH-array but does not exclude very focal deletions or mutations

**Supplementary Table 8 (continued).** Patient characteristics *CNOT3* (NM\_014516.3) mutated cases

| patient | NOTCH1 | transcription factors | other                                     | patient outcome    | survival (months) |
|---------|--------|-----------------------|-------------------------------------------|--------------------|-------------------|
| TLE39   | wt     | TLX1                  | <i>IL7R</i> mutant                        | CR                 | 66+               |
| TLE41   | mutant | MLL                   | <i>IL7R</i> mutant                        | dead after relapse | 18                |
| TLE43   | mutant | TLX1                  | <i>PTPN2</i> deletion, <i>PHF6</i> mutant | dead after relapse | 30                |
| TLE45   | wt     | TLX1                  | <i>PTEN</i> mutant                        | CR                 | 75+               |
| TL21    | NA     | TAL-RB                | deletion <i>LMO2</i>                      | NA                 | NA                |
| TL41    | mutant | CALM-AF10             |                                           | CR                 | NA                |
| TL45    | mutant | HOXA                  | <i>PTPN2</i> deletion                     | CR                 | NA                |
| ALEK127 | NA     | NA                    |                                           | NA                 | NA                |

**Supplementary Table 9.** Patient characteristics RPL mutated cases

| patient | cohort       | gene                       | nucleotide change | amino acid change | Somatic | sex | age (y) | WBC (x10 <sup>9</sup> /l) | blast % | karyotype                                                                                     |
|---------|--------------|----------------------------|-------------------|-------------------|---------|-----|---------|---------------------------|---------|-----------------------------------------------------------------------------------------------|
| TLE07   | exome        | <i>RPL10</i> (NM_006013.3) | c.292C>A          | p.Arg98Ser        | yes     | M   | 3       | 23                        | 55      | 46,XY [25]                                                                                    |
| TLE08   | exome        | <i>RPL10</i> (NM_006013.3) | c.292C>A          | p.Arg98Ser        | yes     | M   | 18      | NA                        | NA      | 46,XY [10]                                                                                    |
| TLE54   | exome        | <i>RPL10</i> (NM_006013.3) | c.292C>A          | p.Arg98Ser        | yes     | F   | 15      | 8                         | 100     | 92,XXXX,DEL(6)(q14q16),del(9)(p11),t(14;20)(q11;p12) [17]; 46, XX [7]                         |
| TLE61   | exome        | <i>RPL10</i> (NM_006013.3) | c.292C>A          | p.Arg98Ser        | yes     | M   | 13      | NA                        | 89      | 46, XY [11]                                                                                   |
| TLE62   | exome        | <i>RPL10</i> (NM_006013.3) | c.292C>A          | p.Arg98Ser        | yes     | M   | 7       | NA                        | 71      | 91, XXY, -3, 4del(9)(p13) [8]; 46, XY, 2del(9)(p13) [1]                                       |
| TLE90   | exome        | <i>RPL10</i> (NM_006013.3) | c.368A>C          | p.Gln123Pro       | NA      | F   | 10      | 31                        | NA      | NA                                                                                            |
| TL29    | confirmation | <i>RPL10</i> (NM_006013.3) | c.292C>A          | p.Arg98Ser        | NA      | F   | 6       | 92                        | 84      | 46,XX[20]                                                                                     |
| TL31    | confirmation | <i>RPL10</i> (NM_006013.3) | c.292C>A          | p.Arg98Ser        | yes     | M   | 8       | 28                        | 93      | 46,XY,del(9)(p11)[20]/46,XY[8]                                                                |
| TL74    | confirmation | <i>RPL10</i> (NM_006013.3) | c.292C>T          | p.Arg98Cys        | yes     | M   | 8       | 27                        | 78      | 46,XY[30]                                                                                     |
| ALEK45  | confirmation | <i>RPL10</i> (NM_006013.3) | c.292C>A          | p.Arg98Ser        | NA      | M   | 9       | NA                        | NA      | NA                                                                                            |
| ALEK84  | confirmation | <i>RPL10</i> (NM_006013.3) | c.292C>A          | p.Arg98Ser        | NA      | F   | 3       | NA                        | NA      | NA                                                                                            |
| TLE39   | exome        | <i>RPL5</i> (NM_000969.3)  | c.535C>T          | p.Arg179*         | yes     | M   | 17      | 405                       | 93      | NA                                                                                            |
| TLE43   | exome        | <i>RPL5</i> (NM_000969.3)  | c.188A>G          | p.Gln63Arg        | yes     | F   | 30      | 46                        | 93      | 46,XX,add(9)(p13),t(10;14)(q23;q11),del(12)(p12)[1]; 46,XX, idic(9)(p13),t(10;14),del(12) [8] |
| TL61    | confirmation | <i>RPL5</i> (NM_000969.3)  | c.175_176delGA    | p.Arg58Fs         | NA      | M   | 10      | 157                       | 92      | +19, 9p+                                                                                      |
| TL58    | confirmation | <i>RPL5</i> (NM_000969.3)  | c.634delAinsGC    | p.Met212Fs        | yes     | F   | 4       | NA                        | NA      | 47,XX,del(9)(p12),+9p+                                                                        |

**Supplementary Table 9 (continued).** Patient characteristics RPL mutated cases

| patient | immune phenotype | CDKN2A* | NOTCH1 | transcription factors** | other                        | patient outcome           | survival (months) |
|---------|------------------|---------|--------|-------------------------|------------------------------|---------------------------|-------------------|
| TLE07   | cortical         | NA      | mutant | -                       |                              | CR                        | 193+              |
| TLE08   | NA               | -/-     | mutant | -                       |                              | NA                        | NA                |
| TLE54   | cortical         | NA      | wt     | NA                      |                              | CR                        | 193+              |
| TLE61   | NA               | +/+     | wt     | -                       |                              | CR                        | 67+               |
| TLE62   | cortical         | -/-     | mutant | -                       |                              | CR                        | 63+               |
| TLE90   | NA               | NA      | mutant | NKX2.1                  |                              | CR                        | 39+               |
| TL29    | cortical         | -/-     | mutant | SIL-TAL1                | MYB duplication              | NA                        | NA                |
| TL31    | cortical         | -/-     | NA     | TAL-RB                  | del(11p)/LMO2, PHF6 deletion | CR                        | NA                |
| TL74    | cortical         | -/-     | mutant | TLX3                    |                              | CR, relapse, patient died | NA                |
| ALEK45  | NA               | NA      | NA     | NA                      |                              | NA                        | NA                |
| ALEK84  | NA               | NA      | NA     | NA                      |                              | NA                        | NA                |
| TLE39   | mature           | NA      | wt     | TLX1                    | IL7R mutant                  | CR                        | 66+               |
| TLE43   | cortical         | -/+     | mutant | TLX1                    | PTPN2 deletion, PHF6 mutant  | CR, relapse, patient died | 30                |
| TL61    | mature           | -/-     | mutant | TLX3                    |                              | NA                        | NA                |
| TL58    | cortical         | -/-     | NA     | TLX1                    |                              | NA                        | NA                |

\* no deletion on 4K CGH-array but does not exclude very focal deletions or mutations

\*\* the sign '-' indicates negative for TLX1, TLX3 and SIL-TAL1

**Supplementary Table 10.** Association between candidate driver mutations and clinicobiological features

| <b>AGE</b>            |           | # adult ( $\geq 16$ y)<br>patients | # pediatric ( $\leq 15$ )<br>patients | P value<br>2-tailed Fisher's test |
|-----------------------|-----------|------------------------------------|---------------------------------------|-----------------------------------|
| <b>NOTCH1</b><br>n=67 | mutant    | 15                                 | 14                                    | p=0.6300                          |
|                       | wild type | 22                                 | 16                                    |                                   |
| <b>FBXW7</b><br>n=67  | mutant    | 7                                  | 1                                     | p=0.0657                          |
|                       | wild type | 30                                 | 29                                    |                                   |
| <b>WT1</b><br>n=67    | mutant    | 2                                  | 5                                     | p=0.4334                          |
|                       | wild type | 35                                 | 25                                    |                                   |
| <b>BCL11B</b><br>n=67 | mutant    | 4                                  | 1                                     | p=0.3700                          |
|                       | wild type | 33                                 | 29                                    |                                   |
| <b>CNOT3</b><br>n=211 | mutant    | 7                                  | 1                                     | <b>p=0.0107</b>                   |
|                       | wild type | 82                                 | 121                                   |                                   |
| <b>RPL10</b><br>n=211 | mutant    | 1                                  | 10                                    | <b>p=0.0268</b>                   |
|                       | wild type | 88                                 | 112                                   |                                   |
| <b>RPL5</b><br>n=211  | mutant    | 2                                  | 2                                     | p=1.0000                          |
|                       | wild type | 87                                 | 120                                   |                                   |
| <b>JAK3</b><br>n=67   | mutant    | 4                                  | 3                                     | p=1.0000                          |
|                       | wild type | 33                                 | 27                                    |                                   |
| <b>PTEN</b><br>n=67   | mutant    | 3                                  | 1                                     | p=0.6220                          |
|                       | wild type | 34                                 | 29                                    |                                   |
| <b>DNM2</b><br>n=67   | mutant    | 1                                  | 3                                     | p=0.3179                          |
|                       | wild type | 36                                 | 27                                    |                                   |

**Supplementary Table 10 (continued).** Association between candidate driver mutations and clinicobiological features

| <b>AGE</b>            |           | # adult ( $\geq 16$ y)<br>patients | # pediatric ( $\leq 15$ )<br>patients | P value<br>2-tailed Fisher's test |
|-----------------------|-----------|------------------------------------|---------------------------------------|-----------------------------------|
| <b>ODZ2</b><br>n=67   | mutant    | 1                                  | 1                                     | p=1.0000                          |
|                       | wild type | 36                                 | 29                                    |                                   |
| <b>PHF6</b><br>n=67   | mutant    | 11                                 | 1                                     | <b>p=0.0083</b>                   |
|                       | wild type | 26                                 | 29                                    |                                   |
| <b>TET1</b><br>n=67   | mutant    | 3                                  | 1                                     | p=0.6220                          |
|                       | wild type | 34                                 | 29                                    |                                   |
| <b>KDM6A</b><br>n=67  | mutant    | 3                                  | 0                                     | p=0.2469                          |
|                       | wild type | 34                                 | 30                                    |                                   |
| <b>MAGEC3</b><br>n=67 | mutant    | 2                                  | 0                                     | p=0.4980                          |
|                       | wild type | 35                                 | 30                                    |                                   |

| <b>NOTCH1 status</b>  |           | # NOTCH1 wt<br>patients | # NOTCH1 mut<br>patients | P value<br>2-tailed Fisher's test |
|-----------------------|-----------|-------------------------|--------------------------|-----------------------------------|
| <b>FBXW7</b><br>n=67  | mutant    | 5                       | 3                        | p=1.0000                          |
|                       | wild type | 33                      | 26                       |                                   |
| <b>WT1</b><br>n=67    | mutant    | 4                       | 3                        | p=1.0000                          |
|                       | wild type | 34                      | 26                       |                                   |
| <b>BCL11B</b><br>n=67 | mutant    | 0                       | 5                        | <b>p=0.0123</b>                   |
|                       | wild type | 38                      | 24                       |                                   |
| <b>CNOT3</b><br>n=84  | mutant    | 2                       | 6                        | p=0.1369                          |
|                       | wild type | 43                      | 33                       |                                   |

**Supplementary Table 10 (continued).** Association between candidate driver mutations and clinicobiological features

| <b>NOTCH1 status</b>  |           | # NOTCH1 wt patients | # NOTCH1 mut patients | P value<br>2-tailed Fisher's test |
|-----------------------|-----------|----------------------|-----------------------|-----------------------------------|
| <b>RPL10</b><br>n=84  | mutant    | 3                    | 6                     | P=0.2918                          |
|                       | wild type | 42                   | 33                    |                                   |
| <b>RPL5</b><br>n=84   | mutant    | 1                    | 2                     | p=0.5948                          |
|                       | wild type | 44                   | 37                    |                                   |
| <b>JAK3</b><br>n=67   | mutant    | 5                    | 2                     | p=0.6899                          |
|                       | wild type | 33                   | 27                    |                                   |
| <b>PTEN</b><br>n=67   | mutant    | 4                    | 0                     | p=0.1273                          |
|                       | wild type | 34                   | 29                    |                                   |
| <b>DNM2</b><br>n=67   | mutant    | 2                    | 2                     | p=1.0000                          |
|                       | wild type | 36                   | 27                    |                                   |
| <b>ODZ2</b><br>n=67   | mutant    | 0                    | 2                     | p=0.1836                          |
|                       | wild type | 38                   | 27                    |                                   |
| <b>PHF6</b><br>n=67   | mutant    | 4                    | 8                     | p=0.1078                          |
|                       | wild type | 34                   | 21                    |                                   |
| <b>TET1</b><br>n=67   | mutant    | 2                    | 2                     | p=1.0000                          |
|                       | wild type | 36                   | 27                    |                                   |
| <b>KDM6A</b><br>n=67  | mutant    | 1                    | 2                     | p=0.5744                          |
|                       | wild type | 37                   | 27                    |                                   |
| <b>MAGEC3</b><br>n=67 | mutant    | 2                    | 0                     | p=0.5016                          |
|                       | wild type | 36                   | 29                    |                                   |



**Supplementary Table 11. RPL10, RPL5 and CNOT3 PCR and sequencing primers and siRNA sequence**

| <b>Amplicon name</b>       | <b>Target gene</b>         | <b>Amplicon size (bp)</b> | <b>Forward primer</b>   | <b>Reverse primer</b>    | <b>Comment</b>           |
|----------------------------|----------------------------|---------------------------|-------------------------|--------------------------|--------------------------|
| <i>CNOT3</i> _Ex2-3        | <i>CNOT3</i> (NM_014516.3) | 392                       | tttaccagccaggggaatacg   | ctgggtcaacaccagaggtc     | PCR + Sequencing of gDNA |
| <i>CNOT3</i> _Ex4          | <i>CNOT3</i> (NM_014516.3) | 233                       | ggctctcgagtccttagcat    | gcagtcactctcccagttc      | PCR + Sequencing of gDNA |
| <i>CNOT3</i> _Ex5          | <i>CNOT3</i> (NM_014516.3) | 248                       | gaactgggagagtggactgc    | gtgaccttcccactctctg      | PCR + Sequencing of gDNA |
| <i>CNOT3</i> _Ex6-7        | <i>CNOT3</i> (NM_014516.3) | 489                       | gtctgtggcccttagtcag     | ccaactcccaggagcataaa     | PCR + Sequencing of gDNA |
| <i>CNOT3</i> _Ex8-9        | <i>CNOT3</i> (NM_014516.3) | 594                       | actgaggacaggttctgtgg    | cagatttgtctcctcgagtcc    | PCR + Sequencing of gDNA |
| <i>CNOT3</i> _Ex10         | <i>CNOT3</i> (NM_014516.3) | 199                       | cattcagagattggcggttc    | ctcaagatgcctttgggaag     | PCR + Sequencing of gDNA |
| <i>CNOT3</i> _Ex11-12      | <i>CNOT3</i> (NM_014516.3) | 739                       | ggacaaagatggagcctgag    | cgctctctgtttcaaaagg      | PCR + Sequencing of gDNA |
| <i>CNOT3</i> _Ex13         | <i>CNOT3</i> (NM_014516.3) | 365                       | tgtgcagctcccctctctc     | gcagctagagacctggagga     | PCR + Sequencing of gDNA |
| <i>CNOT3</i> _Ex14-15      | <i>CNOT3</i> (NM_014516.3) | 526                       | cctgtgtcaggctgcactt     | actgcctcctccgaagact      | PCR + Sequencing of gDNA |
| <i>CNOT3</i> _Ex16         | <i>CNOT3</i> (NM_014516.3) | 344                       | tgctgagacccttttgat      | cccaggagtgggaataggg      | PCR + Sequencing of gDNA |
| <i>CNOT3</i> _Ex17         | <i>CNOT3</i> (NM_014516.3) | 298                       | tgatgtcctgccccattc      | gaggcaagggagcagagg       | PCR + Sequencing of gDNA |
| <i>CNOT3</i> _Ex18         | <i>CNOT3</i> (NM_014516.3) | 292                       | tgacacatccacagccctaa    | cctcctccagcttccag        | PCR + Sequencing of gDNA |
| <i>RPL10</i> _Ex2          | <i>RPL10</i> (NM_006013.3) | 189                       | ttgtgttctcacacctttt     | attgttttcagcgccatag      | PCR + Sequencing of gDNA |
| <i>RPL10</i> _Ex3-4        | <i>RPL10</i> (NM_006013.3) | 290                       | aaagtcctgttgggcttt      | agtgtatgtgggtggggttg     | PCR + Sequencing of gDNA |
| <i>RPL10</i> _Ex5          | <i>RPL10</i> (NM_006013.3) | 205                       | actcagccaacacagttccc    | cagaccaagctcacctgtca     | PCR + Sequencing of gDNA |
| <i>RPL10</i> _Ex6-7        | <i>RPL10</i> (NM_006013.3) | 589                       | agtgtacgcagcctgttgggt   | cctccccgtcaagaatgta      | PCR + Sequencing of gDNA |
| <i>RPL5</i> _Ex1           | <i>RPL5</i> (NM_000969.3)  | 196                       | ctttcccaccccctagcgcc    | gctagcaatctaacgccatcc    | PCR + Sequencing of gDNA |
| <i>RPL5</i> _Ex2-3         | <i>RPL5</i> (NM_000969.3)  | 500                       | gaccctagttgcttgtgaaacc  | cacacatgtgctttgcttc      | PCR + Sequencing of gDNA |
| <i>RPL5</i> _Ex4           | <i>RPL5</i> (NM_000969.3)  | 300                       | catctgtgtccatcaatgtttt  | tgagaaaactctcaagca       | PCR + Sequencing of gDNA |
| <i>RPL5</i> _Ex5           | <i>RPL5</i> (NM_000969.3)  | 384                       | ttccagatgtcagtggtcctt   | tcggttatctccacagtcca     | PCR + Sequencing of gDNA |
| <i>RPL5</i> _Ex6           | <i>RPL5</i> (NM_000969.3)  | 389                       | agttggtccttgggtgcat     | atgttacctgccccaaaac      | PCR + Sequencing of gDNA |
| <i>RPL5</i> _Ex7           | <i>RPL5</i> (NM_000969.3)  | 296                       | tgagaatctggcttagaaggaca | tcacgcagagctagtgatcg     | PCR + Sequencing of gDNA |
| <i>RPL5</i> _Ex8           | <i>RPL5</i> (NM_000969.3)  | 289                       | ccttctgattgcaaagtcttaa  | aacacagaaatagttgctgttcat | PCR + Sequencing of gDNA |
|                            |                            |                           |                         |                          |                          |
| <i>CNOT3</i> _Arg57Gln/Trp | <i>CNOT3</i> (NM_014516.3) | 184                       | gatatttggcagaagctcca    | ttggtttggtctctcgttc      | PCR + Sequencing of cDNA |
| <i>RPL10</i> _Arg98S       | <i>RPL10</i> (NM_006013.3) | 182                       | cccgaattgtgccaataag     | tcacatgctccttgttctgc     | PCR + Sequencing of cDNA |
| <i>RPL10</i> _Gln123Pro    | <i>RPL10</i> (NM_006013.3) | 210                       | caccctccacgtcatc        | gtgaagccccacttctttga     | PCR + Sequencing of cDNA |

| <b>siRNA name</b> | <b>catalog number</b> | <b>company</b> | <b>sequence</b>           |
|-------------------|-----------------------|----------------|---------------------------|
| mouse Rpl10       | MMC.RNAI.N052835.12.2 | IDT            | ccaacaaauacaugguuaagagutg |
